1 **Differential protein metabolism and regeneration in hypertrophic diaphragm and atrophic**  
2 **gastrocnemius muscles in hibernating Daurian ground squirrels**

3

4 Xia Yan <sup>1,2</sup>, Xuli Gao<sup>1,2</sup>, Xin Peng<sup>1,2</sup>, Jie Zhang<sup>1,2</sup>, Xiufeng Ma<sup>1,2</sup>, Yanhong Wei<sup>1,2,3</sup>, Huiping  
5 Wang<sup>1,2</sup>, Yunfang Gao<sup>1,2,\*</sup>, Hui Chang <sup>1,2,\*</sup>

6

7 <sup>1</sup> Shaanxi Key Laboratory for Animal Conservation, Northwest University, Xi'an, 710069, P.R.  
8 China.

9 <sup>2</sup> Key Laboratory of Resource Biology and Biotechnology in Western China (College of Life  
10 Sciences, Northwest University), Ministry of Education, Xi'an, 710069, P.R. China.

11 <sup>3</sup> School of Basic Medical Sciences, Ningxia Medical University, Yinchuan, 750004, China

12 # Equal contributors

13

14 **ms. has 32 pages, 1 table, 8 figures**

15

16 **All the co-authors' email addresses**

17 Xia Yan: 2364348698@qq.com

18 Xuli Gao 672622062@qq.com

19 Xin Peng: 1084875064@qq.com

20 Jie Zhang: 270685828@qq.com

21 Xiufeng Ma: 1639084401@qq.com

22 Yanhong Wei: lovely\_yhwei@126.com

23 Huiping Wang: wanghp@nwu.edu.cn

24

25 **\* Corresponding author:**

26 Dr. Yunfang Gao

27 College of Life Sciences, Northwest University,

28 229# North Taibai Road

29 Xi'an, 710069 China.

30 Tel.: +86 29 88303935.

31 [gaoyunf@nwu.edu.cn](mailto:gaoyunf@nwu.edu.cn)

32

33 Dr. Hui Chang

34 College of Life Sciences, Northwest University,

35 229# North Taibai Road

36 Xi'an, 710069 China.

37 Tel.: +86 29 88303935.

38 [changhui@nwu.edu.cn](mailto:changhui@nwu.edu.cn)

39

40

41 **Abstract**

42 Whether differences in regulation of protein metabolism and regeneration are involved in the  
43 different phenotypic adaptation mechanisms of muscle hypertrophy and atrophy in hibernators?  
44 Two fast-type muscles (diaphragm and gastrocnemius) in summer active and hibernating Daurian  
45 ground squirrels were selected to detect changes in cross-sectional area (CSA), fiber type  
46 distribution, and protein expression indicative of protein synthesis metabolism (protein expression  
47 of P-Akt, P-mTORC1, P-S6K1, and P-4E-BP1), protein degradation metabolism (MuRF1, atrogin-  
48 1, calpain-1, calpain-2, calpastatin, desmin, troponin T, Beclin1, and LC3-II), and muscle  
49 regeneration (MyoD, myogenin, and myostatin). Results showed the CSA of the diaphragm muscle  
50 increased significantly by 26.1%, whereas the CSA of the gastrocnemius muscle decreased  
51 significantly by 20.4% in the hibernation group compared with the summer active group. Both  
52 muscles displayed a significant fast-to-slow fiber-type transition in hibernation. Our study further  
53 indicated that increased protein synthesis, decreased protein degradation, and increased muscle  
54 regeneration potential contributed to diaphragm muscle hypertrophy, whereas decreased protein  
55 synthesis, increased protein degradation, and decreased muscle regeneration potential contributed  
56 to gastrocnemius muscle atrophy. In conclusion, the differences in muscle regeneration and  
57 regulatory pattern of protein metabolism may contribute to the different adaptive changes observed  
58 in the diaphragm and gastrocnemius muscles of ground squirrels.

59

60 **Key words:** hibernation, protein metabolism, regeneration, skeletal muscle, differential adaptation

61

62 **Abbreviation**

63 Akt: protein kinase B

64 mTOR: the mammalian target of rapamycin

65 mTORC1: mammalian target of rapamycin in complex 1

66 S6K1: 70 kDa ribosomal protein S6 kinase 1

67 4E-BP1: eukaryotic initiation factor 4E-binding protein 1

68 CSA: cross-sectional area

69 myoD: myogenic differentiation 1

70 Beclin1: B-cell Lymphoma 2 interacting protein 1

71 LC3: microtubule-associated protein light chain 3

72 MuRF1: Muscle RING finger 1

73 Atrogin-1/MAFbx: muscle atrophy F-box

74

75

## 76 Introduction

77 Although hibernating mammals are recognized as models of disuse-resistant skeletal muscle  
78 atrophy (Bodine 2013, Ivakine and Cohn 2014, Lee et al. 2008, Reilly and Franklin 2016), not all  
79 types of skeletal muscle maintain constant quality during long periods of hibernation. Our and other  
80 previous studies have found that different types of skeletal muscles exhibit different degrees of  
81 atrophy during mammalian hibernation (Cotton 2016, Zhang et al. 2019). The diaphragm is a fast-  
82 type respiratory muscle. Inactivity caused by mechanical ventilation can lead to diaphragm atrophy  
83 (Powers et al. 2013). However, although breathing in hibernating mammals is considerably inhibited  
84 during hibernation (Larson et al. 2014, Staples and Brown 2008), such a condition does not induce  
85 diaphragm atrophy, but rather hypertrophy. For example, previous studies have reported increases  
86 in diaphragm muscle weight of 31.1% and 19% in hibernating Syrian hamsters (*Mesocricetus*  
87 *auratus*) (Deveci and Egginton 2002) and golden-mantled ground squirrels (*Callospermophilus*  
88 *lateralis*), respectively (Reid et al. 1995, Rourke et al. 2004). However, in the fast-type  
89 gastrocnemius muscle, hindlimb unloading in non-hibernating rats resulted in a 42% decrease in  
90 muscle weight and 34%–46% decrease in the cross-sectional area (CSA) of slow and fast muscle  
91 fibers (Hu et al. 2017). In addition, muscle weight in the gastrocnemius muscle also showed a  
92 decrease in small hibernating rodents (8.1%–29.8%), but to a lesser degree and with less atrophy  
93 than that found in non-hibernators (Cotton 2016).

94 Skeletal muscles, as highly plastic tissue, undergo certain adaptive changes in structure and  
95 function when the environment changes (Blaauw et al. 2013). Muscle size is controlled by the  
96 balance between protein synthesis and degradation. Muscle hypertrophy occurs when synthesis is  
97 greater than degradation; in contrast, muscle atrophy occurs when degradation is greater than  
98 synthesis (Romanello and Sandri 2016). The Akt-mTOR signaling pathway plays a key role in the  
99 initiation of protein synthesis in skeletal muscle under the physiological state (Bodine et al. 2001).  
100 Activated mTORC1 (mammalian target of rapamycin in complex 1) phosphorylates downstream  
101 targets S6K1 (70 kDa ribosomal protein S6 kinase 1) and 4E-BP1 (eukaryotic initiation factor 4E-  
102 binding protein 1), resulting in increased protein synthesis (Gordon et al. 2013, Liu et al. 2013).  
103 During hibernation, however, the phosphorylation and activity of Akt and mTOR can be modified.  
104 For example, both are decreased in the thigh and femoral muscles of thirteen-lined ground squirrels  
105 (*Ictidomys tridecemlineatus*) during hibernation and in the pectoral muscles of greater tube-nosed  
106 bats (*Murina leucogaster ognevi*) during torpor (Cai et al. 2004, Lee et al. 2010, Wu and Storey  
107 2012). Furthermore, the expression of phosphorylated 4E-BP is also decreased in the thigh muscles  
108 of thirteen-lined ground squirrels during hibernation (Wu and Storey 2012).

109 Protein degradation of skeletal muscles mainly includes the calpain degradation, ubiquitin-  
110 proteasome, and autophagy-lysosome pathways (Scicchitano et al. 2015). Calpains are the  
111 promoters of muscle protein degradation, which can release myofibrillar proteins from sarcomeres.  
112 The released myofibrillar proteins can be further ubiquitinated and transported to proteasomes for  
113 degradation (Bartoli and Richard 2005, Huang and Forsberg 1998). Muscle RING finger 1 (MuRF1)

114 and muscle atrophy F-box (MAFbx)/atrogen-1 are ubiquitin protein ligases and important molecular  
115 markers for evaluating skeletal muscle atrophy (Foletta et al. 2011). The ubiquitin proteasome  
116 system depends on multiple proteasomes, of which 26S proteasome can cleave the target protein as  
117 peptides (Chen et al. 2015). 26S proteasome is composed of 20S proteasome which mediates the  
118 activity of chymotrypsin and trypsin, and plays an important role in ubiquitin protease system  
119 (Souza et al. 2014). We previously found that calpain-1 and calpain-2 protein expression is  
120 decreased in the soleus muscle, but unchanged in the extensor digitorum longus (EDL) muscle in  
121 Daurian ground squirrels during hibernation, whereas the expression of calpastatin, an endogenous  
122 inhibitor of calpains, is increased in both (Chang et al. 2018b). Calpain can degrade substrates such  
123 as desmin, troponin T, troponin I, titin, alpha-fodrin and alpha-actinin, (Barta et al. 2005). Desmin  
124 and troponin T are more sensitive to calpain than other substrates (Li et al. 2017). Desmin is located  
125 around the Z-discs and connects the adjacent Z-discs to the sarcolemma and the nucleus (Capetanaki  
126 et al. 1997). Troponin T plays an important role in regulating protein system, which can bind to  
127 tropomyosin to form a complex (Perry 1998). Furthermore, various stress conditions (including  
128 fasting, oxidative stress, and hypoxia) can induce autophagy as an adaptive physiological response  
129 to restore cell metabolism. Increased autophagy is a survival-promoting mechanism rather than a  
130 death-promoting mechanism (He et al. 2012, Levine and Yuan 2005, Moresi et al. 2012), and is an  
131 important pro-survival mechanism in myocardial hibernation (May et al. 2008). However, previous  
132 study has indicated that autophagy is inhibited in fast muscles, including quadriceps and anterior  
133 tibial muscles, of hibernating thirteen-lined ground squirrels (Andres-Mateos et al. 2013). Therefore,  
134 we hypothesize that the opposite adaptabilities of skeletal muscles in hibernating Daurian ground  
135 squirrels, that is, hypertrophy and atrophy, are due to changes in the balance between protein  
136 synthesis and degradation.

137 Muscle regeneration includes an increase in protein synthesis (hypertrophy) and proliferation of  
138 muscle satellite cells (hyperplasia) and is a repair mechanism of muscle injury (Zanou and Gailly  
139 2013). Previous studies have shown that the regeneration potential of disused skeletal muscle is  
140 changed (Suetta et al. 2013, Wall et al. 2014). MyoD (myogenic differentiation) and myogenin are  
141 myogenic regulatory factors (MRFs). MyoD is a molecular marker of muscle satellite cells  
142 activation into muscle progenitor cells (Zanou and Gailly 2013), and myogenin plays a key role in  
143 the fusion of myoblasts to form myotubes (Hasty et al. 1993). Even though the number of satellite  
144 cells decreases during mechanical unloading, the expression of markers of satellite cell activation  
145 increases (Arentson-Lantz et al. 2016, Guitart et al. 2018). Myostatin, a transforming growth factor-  
146 beta (TGF $\beta$ ) family member, is a negative regulator of the proliferation and differentiation of muscle  
147 satellite cells. Inactivation of myostatin can lead to skeletal muscle hypertrophy, whereas  
148 overexpression can lead to muscle atrophy (Langley et al. 2002, McFarlane et al. 2011, Rodriguez  
149 et al. 2014). Myostatin not only regulates the growth and size of skeletal muscle, but also interacts  
150 with the Akt-mTOR pathway to regulate protein synthesis (Schiaffino et al. 2013, Trendelenburg et  
151 al. 2009). So far, however, contradictions still exist regarding whether skeletal muscle regeneration

152 is involved in maintaining muscle quality in hibernating small mammals. For example, previous  
153 studies have reported no atrophy in muscles ablated of satellite cells in hibernating thirteen-lined  
154 ground squirrels (Andres-Mateos et al. 2012), but also reported that muscle satellite cells are not  
155 quiescent and actually increase during hibernation (Brooks et al. 2015). Therefore, in the current  
156 study, we attempted to clarify any differences in regeneration between two types of skeletal muscle  
157 with different adaptive changes, and whether regeneration plays a differential regulatory role in  
158 muscle maintenance in hibernating Daurian ground squirrels.

159 In this study, we examined two fast-type muscles (diaphragm and gastrocnemius) that exhibit  
160 different adaptative changes during hibernation (hypertrophic and atrophic adaptation, respectively)  
161 in Daurian ground squirrels. To elucidate the differential regulation of protein metabolism and  
162 muscle regeneration in the two types of skeletal muscle, we measured the CSA, fiber type  
163 distribution, protein synthesis metabolism (protein expression of P-Akt, P-mTORC1, P-S6K1, and  
164 P-4E-BP1), protein degradation metabolism (MuRF1, atrogin-1, calpain-1, calpain-2, calpastatin,  
165 desmin, troponin T, Beclin1 and LC3-II), proteasome activity, and muscle regeneration (MyoD,  
166 myogenin and myostatin) in the diaphragm and gastrocnemius muscles of summer active (SA) and  
167 hibernating (HIB) Daurian ground squirrels.

## 168 **Methods**

### 169 **Acquisition and use of animals**

170 The animals' acquisition and use were approved by the Northwest University Ethics Committee.  
171 As described by our laboratory previously (Chang et al. 2018a, Chang et al. 2018b), sixteen Daurian  
172 ground squirrels of both sexes were captured from the Weinan plain in the Shaanxi province of  
173 China and fed with water and rat chow *ad libitum*. The ground squirrels were moved to a cold room  
174 at 4-6°C when they entered torpor in November with 1 individual per cage. The ground squirrels  
175 used in this experiment were in a natural hibernation state. The time of entering torpor was judged  
176 by putting sawdust on the back of each individual and reducing a body temperature ( $T_b$ ) below 9°C.  
177  $T_b$  was measured by thermal imaging using a visual thermometer (Fluke VT04 Visual IR  
178 Thermometer, USA). According to our observations, the ground squirrels did not eat and drink after  
179 entering torpor state. Moreover, most ground squirrels recovered to hibernation state after 1-2 days  
180 of interbout arousals. The ground squirrels were divided into 2 groups randomly ( $n = 8$ , with 5  
181 females and 3 males in each group): (1) summer active (SA): active ground squirrels in July with a  
182  $T_b$  of 36-38°C; (2) hibernation (HIB): ground squirrels experiencing two months of hibernation with  
183  $T_b$  maintained at 5-8°C and were sampled in torpor state.

### 184 **Muscle collection**

185 After the body weight was recorded, the ground squirrels were anesthetized with 90 mg/kg  
186 sodium pentobarbital intraperitoneally. Then the diaphragm and gastrocnemius muscles from both  
187 legs were separated and removed. Subsequently, the muscle samples were put into liquid nitrogen

188 and stored for the follow-up experiments. The animals were sacrificed by an overdose injection of  
189 sodium pentobarbital while finishing surgical intervention.

### 190 **Immunofluorescent analysis**

191 The muscle fiber cross-sectional area (CSA) and fiber type composition were measured by  
192 immunofluorescent analysis as described by our laboratory previously (Chang et al. 2018b). Briefly,  
193 5 mm of the mid-belly of lateral gastrocnemius muscle was cut into 10- $\mu$ m thick frozen muscle  
194 cross-sections at -20°C with a cryostat (Leica, Wetzlar, CM1850, Germany). Because of the uneven  
195 thickness of the diaphragm, the fixed geometric position of the muscle strips was cut for slicing (see  
196 the yellow box in **Figure 1A**). Then the slides with sections were fixed in 4% paraformaldehyde for  
197 30 min, and subsequently permeabilized in 0.1% Triton X-100 (dissolve in PBS) for 30 min. The  
198 slides were then blocked with 1% bovine serum albumin (BSA) in PBS for 60 min at room  
199 temperature, and immediately incubated at 4°C overnight with the anti-laminin rabbit polyclonal  
200 antibody (1:200, Boster, BA1761-1) to visualize the myofiber interstitial tissue and the anti-skeletal  
201 slow myosin mouse monoclonal antibody (1:200, Boster, BM1533) to visualize the type I MHC in  
202 both muscles. The slides were rinsed twice in PBS and incubated with Alexa Fluor 647-labeled IgG  
203 secondary antibody (1:200; Thermo Fisher Scientific, #A21245) and FITC-labeled IgG secondary  
204 antibody (1:200; Sigma, F1010) for 60 min. The staining method of anti-MYH1 (IIx) mouse  
205 antibody (1:400, Abcam, ab127539) was the same as that of anti-skeletal slow myosin mouse  
206 monoclonal antibody, only the first antibodies were different, with anti-MYH1 (IIx) mouse antibody  
207 followed by FITC-labeled IgG secondary antibody. Anti-MYH2 (IIa) rabbit antibody and anti-  
208 laminin rabbit polyclonal antibody need to be stained separately. First, anti-MYH2 (IIa) rabbit  
209 antibody (1:200, Abcam, ab124937) was incubated overnight at 4°C and followed by Alexa Fluor  
210 488-labeled anti-rabbit antibody (Thermo Fisher Scientific, A-21235). Next, anti-laminin rabbit  
211 polyclonal antibody was incubated overnight at 4°C and followed by Alexa Fluor 647-labeled anti-  
212 rabbit antibody. The staining method of anti-MYH4 (IIb) rabbit antibody (1:100, Santa Cruz  
213 Biotechnology, #34820) was the same as that of anti-MYH2 (IIa) rabbit antibody, only the first  
214 antibodies were different, with anti-MYH4 (IIb) rabbit antibody followed by Alexa Fluor 488-  
215 labeled anti-rabbit antibody. Photographs were acquired by using confocal microscopy (Olympus,  
216 Osaka, Japan) at an objective magnification of 40 $\times$ . Image-Pro Plus 6.0 software was used to  
217 measure the CSA of at least 10 different visual fields of each sample.

### 218 **Proteasome activity**

219 The chymotrypsin and trypsin activities of diaphragm and gastrocnemius muscles were  
220 determined by ultraviolet spectrophotometry according to the instructions of chymotrypsin assay  
221 kit (Nanjing Jiancheng Bioengineering Institute, A080-3-1) and trypsin assay kit (Nanjing  
222 Jiancheng Bioengineering Institute, A080-2-2).

### 223 **Western blots**



224 As described previously by our lab (Chang et al. 2016, Chang et al. 2018b), the total protein was  
225 extracted from the frozen diaphragm and gastrocnemius muscles of ground squirrels by  
226 homogenization and put into a sample buffer (pH 6.8, 100 mM Tris, 4% SDS, 5% glycerol, 5% 2-  
227  $\beta$ -mercaptoethanol, and bromophenol blue). Then the muscle protein extracts were resolved by  
228 SDS-PAGE using Laemmli gels (10%) with the 1% 2,2,2-Trichloroethanol (TCE) (aladdin,  
229 J1522028, China). After electrophoresis, the total proteins bands are visualized by putting the gel on  
230 the UV transilluminator and irradiating the gel for 2 min, and Syngene G:BOX system (Syngene,  
231 Frederick, MD) was used to take photographs of the gel. Then the protein gel was transferred  
232 electrically to PVDF membranes (0.45  $\mu$ m) using a Bio-Rad semi-dry transfer apparatus. The  
233 blotted PVDF membranes were incubated with 1% BSA in TBS (Tris-buffered saline; 50 mM Tris-  
234 HCl, 150 mM NaCl, pH 7.5) and anti-skeletal slow myosin mouse monoclonal antibody (1:500,  
235 Boster, BM1533), anti-MYH2 (IIa) rabbit antibody (1:1000, Abcam, ab124937), anti-MYH4 (IIb)  
236 rabbit antibody (1:1000, Santa Cruz Biotechnology, #34820), anti-MYH1 (IIx) mouse antibody  
237 (1:1000, Abcam, ab127539), P-Akt (Ser473) (1:1,000, abcam, 81283), P-mTORC1  
238 (Ser2448)(1:1,000, sigma, 4504476), P-S6K1 (Thr389) (1:1,000, Cell Signaling Technology (CST),  
239 9205S), P-4E-BP1 (Thr37/46)(1:1,000, CST, 2855S), calpain-1 (1:1,000, CST, 2556S), calpain-2  
240 (1:1,000, CST, 2539S), calpastatin (1:1,000, CST, 4146S), desmin (1:1,000, CST, 4024S), troponin  
241 T (1:1,000, Sigma, T6277), MuRF1 (1:1000, Abcam, ab172479), atrogin-1 (1:1,000, Proteintech,  
242 12866-1-AP), Beclin1 (1:1000, CST, 3738), LC3 (1:1000, abcam, ab48394), MyoD (1:1,000,  
243 proteintech, 18943-1-AP), myogenin (1:1,000, abcam, 124800) and myostatin (1:1,000, proteintech,  
244 19142-1-AP) antibodies, respectively, in TBS containing 0.1% BSA at 4°C overnight. Then the  
245 membrane was washed with TBST for 4 times (10 minutes/time) and incubated with HRP-  
246 conjugated anti-mouse secondary antibody (1:10000, Thermo Fisher Scientific, A28177) or HRP-  
247 conjugated anti-rabbit secondary antibody (1:5000, Thermo Fisher Scientific, A27036) for 2 h at  
248 room temperature. Then the PVDF membrane was washed for 3 times (10 min/time). The  
249 fluorescent band were visualized using enhanced chemiluminescence reagents (Thermo Fisher  
250 Scientific, NCI5079). The NIH Image J software was used to carry out quantification analysis. The  
251 density of immunoblot band in each individual lane was standardized by the summed densities from  
252 a group of total protein bands in the same lane. This method of standardizing by total protein has  
253 been proved to be more accurate and appropriate in comparison with standardizing by housekeeping  
254 proteins such as GAPDH, actin and tubulin (Vigelso et al. 2015, Zhang et al. 2016b).

## 255 **Statistical analyses**

256 All data were analyzed using SPSS 19.0 and expressed as means  $\pm$  SEM. An independent-samples  
257 *t*-test was used to determine the significant differences between SA and HIB ground squirrels. A  
258 value of  $P < 0.05$  was considered to be statistically significant.

## 259 **Results**

### 260 **Body weight and muscle wet weight**

261 As shown in **Table 1**, the body weight of HIB group was significantly reduced by 11% ( $P < 0.05$ )  
262 as compared with SA group at experiment time.

263 Compared with SA group, the muscle weight of the gastrocnemius muscle in the HIB group was  
264 significantly reduced by 18% ( $P < 0.05$ ), while the muscle weight of the diaphragm muscle was  
265 significantly increased by 14% ( $P < 0.05$ ) (**Figure 1B**).

#### 266 **Fiber CSA and fiber type distribution**

267 The CSA and fiber type distribution of the diaphragm and gastrocnemius (lateral) muscle fibers  
268 were measured by immunofluorescent staining. Compared with the SA group, the CSA of the  
269 diaphragm muscle increased significantly (26.1%,  $P < 0.05$ ), whereas that of the gastrocnemius  
270 muscle decreased significantly (20.4%,  $P < 0.05$ ) in the HIB group (**Figure 1C and 1D**).

271 As shown in **Figure 2A**, results showed that both the MHCI and MHC II fiber isoforms were  
272 expressed in the diaphragm and gastrocnemius muscles. The percentage of type I fibers in the  
273 diaphragm and gastrocnemius muscles was significantly increased (33% and 36%, respectively,  $P$   
274  $< 0.05$ ) in the HIB group compared with that in the SA group (**Figure 2B and 2C**). The proportion  
275 of MHC IIa fiber in the HIB group was significantly reduced by 6% ( $P < 0.05$ ) in the diaphragm  
276 muscle, while it was significantly increased in the gastrocnemius muscle by 9% ( $P < 0.05$ ) as  
277 compared with SA group (**Figure 2B and 2C**). In contrast, the proportion of MHC IIb fiber was  
278 significantly increased by 21% ( $P < 0.05$ ) in the diaphragm muscle, while it was significantly  
279 decreased by 15% ( $P < 0.05$ ) in the gastrocnemius muscle of the HIB group as compared with that  
280 in the SA group (**Figure 2B and 2C**). As compared with SA group, the proportion of MHC IIx fiber  
281 in the diaphragm and gastrocnemius muscles in the HIB group was significantly increased by 7%  
282 ( $P < 0.05$ ) and 16% ( $P < 0.05$ ), respectively (**Figure 2B and 2C**).

283 Besides, the protein expression levels of MHC I, MHC IIa, MHC IIb and MHC IIx in the  
284 diaphragm and gastrocnemius muscle were analyzed by western blots. As compared with SA group,  
285 MHC I protein expression level in the HIB group was significantly increased by 1.41-fold ( $P < 0.05$ )  
286 and 2.07-fold ( $P < 0.05$ ) in the diaphragm and gastrocnemius muscles, respectively (**Figure 3A and**  
287 **3B**). In the diaphragm muscle, the protein expression level of MHC IIa was decreased significantly  
288 in the HIB group compared with that in the SA group (28%,  $P < 0.05$ ). However, the MHC IIa  
289 expression was significantly increased by 1.34-fold ( $P < 0.05$ ) in the gastrocnemius muscle of the  
290 HIB group as compared with SA group (**Figure 3A and 3C**). The protein expression level of MHC  
291 IIb was significantly increased by 1.36-fold ( $P < 0.05$ ) in the diaphragm muscle, while it was  
292 significantly decreased by 34% ( $P < 0.05$ ) in the gastrocnemius muscle in the HIB group compared  
293 with that in the SA group (**Figure 3A and 3D**). The protein expression level of MHC IIx in the  
294 diaphragm and gastrocnemius muscles in the HIB group was 1.48-fold ( $P < 0.05$ ) and 1.3-fold ( $P <$   
295  $0.05$ ) higher than that in the SA group, respectively (**Figure 3A and 3E**).

#### 296 **Protein expression levels of MuRF1, atrogin-1, Beclin1 and LC3-II indicative of protein** 297 **degradation metabolism,**



298 Compared with that in the SA group, MuRF1 protein expression significantly decreased in the  
299 diaphragm muscle (16.0%,  $P < 0.05$ ), but significantly increased in the gastrocnemius muscle (1.3-  
300 fold,  $P < 0.05$ ) in the HIB group (**Figure 4A and 4B**). The expression level of atrogin-1 was  
301 significantly decreased by 17% ( $P < 0.05$ ) in the diaphragm muscle, while it was significantly  
302 increased by 1.3-fold ( $P < 0.05$ ) in the gastrocnemius muscle in the HIB group compared with that  
303 in the SA group (**Figure 4A and 4C**). In addition, autophagy-related proteins Beclin1 and LC3-II  
304 both showed significant increases (1.2-fold and 1.5-fold, respectively,  $P < 0.05$ ) in the diaphragm  
305 muscle of the HIB group compared with that in the SA group. In contrast, both were significantly  
306 decreased in the gastrocnemius muscle (32.6% and 31.9%, respectively,  $P < 0.05$ ) of the HIB group  
307 compared with that of the SA group (**Figure 4A, 4D and 4E**).

### 308 **Proteasome activity**

309 Compared with SA group, chymotrypsin and trypsin activities in HIB group were significantly  
310 decreased by 60.5% and 52.8% ( $P < 0.05$ ), respectively, in diaphragm muscle, but were significantly  
311 increased by 32.7% and 79.9% ( $P < 0.05$ ), respectively, in gastrocnemius muscle (**Figure 5A and**  
312 **5B**).

### 313 **Protein expression levels of calpain-1, calpain-2, calpastatin, desmin and troponin T indicative** 314 **of protein degradation metabolism**

315 The protein expression level of calpain-1 and calpain-2 both showed a significant decrease (30%  
316 and 46.3%, respectively,  $P < 0.05$ ) in the diaphragm muscle of the HIB group compared with levels  
317 in the SA group. In contrast, calpain-1 and calpain-2 protein expression levels were significantly  
318 increased in the gastrocnemius muscle (1.9-fold and 1.5-fold, respectively,  $P < 0.05$ ) in the HIB  
319 group compared with levels in the SA group (**Figure 6A, 6B and 6C**). Furthermore, contrary to  
320 calpain-1 and calpain-2, calpastatin protein expression showed a significant 1.6-fold ( $P < 0.05$ )  
321 increase in the diaphragm muscle, but a significant 32.6% ( $P < 0.05$ ) decrease in the gastrocnemius  
322 muscle of the HIB group compared with that in the SA group (**Figure 6A and 6D**). The protein  
323 expression level of desmin was significantly increased by 1.51-fold ( $P < 0.05$ ) in the diaphragm  
324 muscle, while it was significantly decreased by 23% ( $P < 0.05$ ) in the gastrocnemius muscle in the  
325 HIB group compared with that in the SA group (**Figure 6A and 6E**). However, the protein  
326 expression level of troponin T in both diaphragm and gastrocnemius muscles showed no significant  
327 difference between the HIB and SA groups (**Figure 6A and 6F**).

### 328 **Protein expression levels of P-Akt, P-mTORC1, P-S6K1 and P-4E-BP1 indicative of protein** 329 **synthesis metabolism**

330 Western blots analysis was used to detect the protein expression levels of P-Akt, P-mTORC1, P-  
331 S6K1, and P-4E-BP1 in the diaphragm and gastrocnemius muscles. As shown in **Figure 7**, P-Akt  
332 protein expression significantly increased by 1.2-fold ( $P < 0.05$ ) in the diaphragm muscle, but  
333 significantly decreased by 55.3% ( $P < 0.05$ ) in the gastrocnemius muscle in the HIB group versus

334 the SA group (**Figure 7A and 7B**). Similarly, P-mTORC1 protein expression showed a significant  
335 1.4-fold ( $P < 0.05$ ) increase in the diaphragm muscle, but a significant 30.9% ( $P < 0.05$ ) decrease  
336 in the gastrocnemius muscle in the HIB group compared with that in the SA group (**Figure 7A and**  
337 **7C**). Moreover, the P-S6K1 and P-4E-BP1 protein expression levels in the diaphragm muscle  
338 increased significantly by 1.4-fold ( $P < 0.05$ ) and 1.3-fold ( $P < 0.05$ ), respectively, in the HIB group  
339 compared with that in the SA group. In contrast, the P-S6K1 and P-4E-BP1 protein expression levels  
340 in the gastrocnemius muscle decreased significantly by 30.9% ( $P < 0.05$ ) and 22.7% ( $P < 0.05$ ),  
341 respectively, in the HIB group compared with levels in the SA group (**Figure 7A, 7D and 7E**).

#### 342 **Protein expression levels of MyoD, myogenin and myostatin indicative of muscle regeneration**

343 MyoD and myogenin protein expression levels showed a significant 1.3-fold ( $P < 0.05$ ) and 1.4-  
344 fold ( $P < 0.05$ ) increase, respectively, in the diaphragm muscle, but a significant 26.7% ( $P < 0.05$ )  
345 and 12.2% ( $P < 0.05$ ) decrease, respectively, in the gastrocnemius muscle of the HIB group  
346 compared with that of the SA group (**Figure 8A, 8B and 8C**). In contrast, the myostatin protein  
347 expression level decreased by 38.2% ( $P < 0.05$ ) in the diaphragm muscle but increased by 2.3-fold  
348 ( $P < 0.05$ ) in the gastrocnemius muscle in the HIB group compared with the SA group (**Figure 8A**  
349 **and 8D**).

#### 350 **Discussion**

351 In the present study, changes in key signals of protein synthesis, protein degradation, and muscle  
352 regeneration were detected to determine the mechanism(s) related to the differential adaptability of  
353 the diaphragm and gastrocnemius muscles in hibernating Daurian ground squirrels. The wet weight  
354 of the diaphragm muscle was significantly increased, while it was significantly decreased in  
355 gastrocnemius muscle (**Figure 1B**). Due to its importance as a respiratory muscle, the CSA of the  
356 diaphragm muscle fibers showed significant hypertrophy (26.1% increase) (**Figure 1C and 1D**)  
357 during hibernation. However, the CSA of the gastrocnemius muscle was not completely preserved,  
358 instead showing significant atrophy (20.4% decrease) (**Figure 1C and 1D**). Consistent with our  
359 findings, previous studies have also shown significant muscle wet weight loss (14%) in the  
360 gastrocnemius muscle of hibernating golden-mantled ground squirrels (Wickler et al. 1991), but  
361 significant muscle weight gain (40% and 19%) in the diaphragm muscle of hibernating Syrian  
362 hamsters (Deveci and Egginton 2002) and golden-mantled ground squirrels, respectively (Reid et  
363 al. 1995). In addition, the results of both immunofluorescent analysis and western blots showed that  
364 the expressions of MHC I and MHC IIx in the HIB group were significantly increased in the  
365 gastrocnemius and diaphragm muscles, the expression of MHC IIa was significantly increased in  
366 the gastrocnemius muscle, while it was significantly decreased in the diaphragm muscle, besides,  
367 MHC IIb expression was significantly reduced in the gastrocnemius muscle while it showed a  
368 significant increase in the diaphragm muscle compared with the SA group. Furthermore, both the  
369 diaphragm and gastrocnemius muscles displayed a significant fast-to-slow fiber type transition  
370 (**Figure 2**). Consistent with our recent study, the gastrocnemius muscle showed a fast-to-slow fiber

371 type transition during hibernation in Daurian ground squirrels (Ma et al. 2019), in contrast, the fiber  
372 type in the gastrocnemius muscle of the hindlimb unloading rat showed a significant slow-to-fast  
373 fiber type shift (Jones et al. 2003). Both type I and type II fibers of the diaphragm were significantly  
374 atrophied in the mechanically ventilated rats (Ichinoseki-Sekine et al. 2014). Therefore, our study  
375 again demonstrates that there is a fast-to-slow fiber type transition in different skeletal muscles in  
376 hibernating ground squirrels. In this study, we investigated the mechanism(s) related to the  
377 differences in the physiological adaptations of the diaphragm and gastrocnemius muscles in  
378 hibernating Daurian ground squirrels from three aspects: i.e., protein synthesis, protein degradation,  
379 and muscle regeneration.

380 MuRF1 and atrogin-1 are considered as molecular markers of muscular atrophy. Earlier studies  
381 have shown that MuRF1 protein expression is significantly increased in the gastrocnemius muscle  
382 of hindlimb-unloaded rats, which subsequently induces overexpression of ubiquitin protein and  
383 muscle atrophy (Su et al. 2014). Moreover, the expression level of atrogin-1 mRNA is significantly  
384 increased by 2-fold in the gastrocnemius muscle of hindlimb unloading mice (Al-Nassan et al. 2012).  
385 Furthermore, both the protein expression levels of MuRF1 and atrogin-1 were significantly  
386 increased in the diaphragm of mechanically ventilated rats (Maes et al. 2014). Previous studies have  
387 shown that chymotrypsin and trypsin activities were transiently increased in the gastrocnemius  
388 muscle after 5 days of hindlimb-unloaded rats (Magne et al. 2011). Earlier studies have reported  
389 significant increases in both chymotrypsin and trypsin activity in the diaphragm muscle of  
390 mechanically ventilated rats (McClung et al. 2008). Our results showed that MuRF1, atrogin-1  
391 protein expression, chymotrypsin and trypsin activities were all significantly increased in the  
392 gastrocnemius muscle of hibernating squirrels compared with the summer active group (**Figure 4B**  
393 **and 4C**), which is consistent with our recent study (Ma et al. 2019, Wei et al. 2018) and further  
394 indicating that high MuRF1 and atrogin-1 protein expression may be involved in protein degradation  
395 and gastrocnemius muscle atrophy. In contrast, we found that MuRF1, atrogin-1 protein expression,  
396 chymotrypsin and trypsin activities were significantly decreased in the diaphragm muscle, which  
397 may be an anti-atrophy mechanism of this muscle in hibernating Daurian ground squirrels.

398 The calpain system plays an essential role in muscle protein degradation and is a likely component  
399 of the targets of disuse atrophy, especially in relation to myofibrillar disassembly (Jackman and  
400 Kandarian 2004). Previous studies have demonstrated that calpain-induced myofibrillar protein  
401 degradation (Smuder et al. 2010) as well as calpain activity (e.g., by 95%) (Bruells et al. 2016) are  
402 both increased in the diaphragm of rats under mechanical ventilation. Our results showed that  
403 protein expression of calpain-1 and calpain-2 increased by 94.6% and 47.2%, respectively, whereas  
404 that of calpastatin (an endogenous inhibitor of calpains) decreased by 42.4% in the gastrocnemius  
405 muscle of the hibernating group compared with that of the summer active group (**Figure 6B, 6C**  
406 **and 6D**), suggesting that the up-regulation of calpain signals may contribute to gastrocnemius  
407 muscle atrophy. However, consistent with our previous studies in the soleus and extensor digitorum  
408 longus muscles (both showing no significant atrophy in hibernation) (Chang et al. 2018b, Yang et

409 al. 2014), the protein expression levels of calpain-1 and calpain-2 decreased by 30% and 46.6%,  
410 respectively, whereas that of calpastatin increased by 60% in the diaphragm muscle of hibernating  
411 ground squirrels compared with the summer active group (**Figure 6B, 6C and 6D**). Higher calpain-  
412 1 (1.44-fold) and calpain-2 (2.38-fold) activity has also been observed in the longissimus dorsi and  
413 soleus muscles of hibernating long-tailed ground squirrels (*Spermophilus undulatus*) compared with  
414 summer active squirrels (Popova et al. 2017). Calpain can hydrolyze substrates such as desmin and  
415 troponin T (Barta et al. 2005). Our study showed that desmin was significantly decreased in the  
416 gastrocnemius muscle of the HIB group and significantly increased in the diaphragm muscle  
417 compared with the SA group, however, troponin T showed no significant changes between the  
418 gastrocnemius and diaphragm muscles (**Figure 6**), which indicated that different substrates have  
419 different sensitivity to the calpain system. Our previous study showed desmin expression was  
420 unchanged in soleus muscle and extensor digitorum longus muscle of Daurian ground squirrels  
421 during hibernation, but was significantly reduced by 39-51% in hindlimb unloading rats (Chang et  
422 al. 2018b). Our recent study also showed that the protein expression of desmin in gastrocnemius  
423 muscle was significantly decreased, while troponin T was unchanged during hibernation in Daurian  
424 ground squirrels (Ma et al. 2019). Therefore, our data suggest that the muscle-specific activation of  
425 the calpain system and degradation of different substrates may be involved in the different  
426 adaptabilities of the diaphragm and gastrocnemius muscles in Daurian ground squirrels during  
427 hibernation.

428 Beclin1 (B-cell Lymphoma 2 interacting protein 1) and LC3 (microtubule-associated protein light  
429 chain 3) are two molecular markers of autophagy. Beclin1 can form complexes that induce proteins  
430 to be located on the autophagic membrane (Kihara et al. 2001). Furthermore, LC3 is involved in the  
431 formation of the autophagic membrane, whereby LC3-I converts into LC3-II for the formation of  
432 autophagosomes (Tanida et al. 2005, Tanida et al. 2004). Earlier studies have reported significant  
433 increases in the mRNA and protein expression levels of Beclin1 (1.91-fold and 30%, respectively)  
434 and LC3 (1.82-fold and 30%, respectively) in the diaphragm muscles of mechanically ventilated  
435 rats (Smuder et al. 2018). Furthermore, hindlimb unloading in mice reportedly results in the up-  
436 regulation of Beclin1 mRNA and induction of autophagy in soleus muscle atrophy (Cannavino et  
437 al. 2014). In the current study, the protein expression levels of Beclin1 and LC3-II in the  
438 gastrocnemius muscle of hibernating ground squirrels were significantly lower (Beclin1, -31.9%,  
439 LC3-II, -32.6%,  $P < 0.05$ ) than those in the summer active group, whereas the expression levels of  
440 Beclin1 and LC3-II in the diaphragm muscle were significantly higher (Beclin1, 46%, LC3-II,  
441 22.2%,  $P < 0.05$ ). Our results showed that autophagy was suppressed in the gastrocnemius muscle  
442 but was promoted in the diaphragm muscle of the hibernating ground squirrels. Consistent with our  
443 gastrocnemius muscle results, earlier research demonstrated a decrease in the LC3-II/LC3-I ratio in  
444 the quadriceps and tibialis anterior muscles of thirteen-lined ground squirrels during hibernation,  
445 thus indicating suppression of autophagy (Andres-Mateos et al. 2013). Our data suggest that protein  
446 degradation causing gastrocnemius muscle atrophy occurred primarily through the ubiquitin

447 pathway rather than the autophagy-lysosome pathway. The elevated level of autophagy in the  
448 diaphragm muscle may correspond to the elevated level of diaphragm muscle protein synthesis,  
449 both of which promoted protein turnover and diaphragm hypertrophy.

450 As key molecules mediating the Akt-mTOR signaling pathway in protein synthesis, the protein  
451 expression levels of Akt and mTOR are significantly decreased in the diaphragm after mechanical  
452 ventilation, as is the protein expression of downstream target 4E-BP1 (Hudson et al. 2015, Yu et al.  
453 2018). Moreover, gastrocnemius myofibrillar protein content and synthesis (mg/day) are shown to  
454 decrease significantly (by 26% and 64%, respectively) in rats undergoing tail suspension  
455 (Linderman et al. 1994). In the present study, four protein synthesis markers, i.e., P-Akt, P-mTORC1,  
456 P-S6K1, and P-4E-BP1, were significantly increased by 17%, 37%, 40%, and 31% ( $P < 0.05$ ),  
457 respectively, in the diaphragm muscle, but were significantly decreased by 55%, 31%, 42% and 23%  
458 ( $P < 0.05$ ), respectively, in the gastrocnemius muscle during hibernation compared with levels  
459 during summer activity (**Figure 7**). Similar to our findings in the gastrocnemius muscle, Akt activity  
460 and phosphorylated Akt (Ser 473) are reported to decrease (by 60% and 40%, respectively) in  
461 skeletal muscle during hibernation in Richardson's ground squirrels (*Spermophilus richardsonii*)  
462 compared with euthermic controls, which may contribute to the coordinated suppression of energy-  
463 expensive anabolism during winter torpor (Abnous et al. 2008). Moreover, research has shown that  
464 Akt/PKB activity exhibits seasonal peaks in the gastrocnemius muscle of yellow-bellied marmots  
465 (*Marmota flaviventris*) during their annual cycle, thereby demonstrating tissue-specific seasonal  
466 activation (Hoehn et al. 2004). Thus, our results suggest that the up-regulation of protein synthesis  
467 contributes to the diaphragm muscle hypertrophy, whereas the down-regulation of protein synthesis  
468 contributes to the gastrocnemius muscle atrophy found in hibernating Daurian ground squirrels.

469 Whether muscle regeneration potential in different skeletal muscles is altered in response to  
470 hibernation has remained unexplored. Here, we determined the protein expression levels of key  
471 markers, such as MyoD, myogenin, and myostatin, in satellite cell regulatory pathways. The  
472 expression level of MyoD showed a significant 1.3-fold ( $P < 0.05$ ) increase in the diaphragm muscle,  
473 but a significant 26.7% ( $P < 0.05$ ) decrease in the gastrocnemius muscle of hibernating squirrels  
474 compared with the active group (**Figure 8A and 8B**). Mechanical ventilation is known to induce a  
475 decrease in MyoD mRNA and protein expression in the diaphragm muscle of rats (Maes et al. 2008,  
476 Racz et al. 2003), suggesting the inactivation of quiescent satellite cells. Furthermore, muscle disuse  
477 can induce a decline in satellite cells together with an up-regulation in MyoD, suggesting that  
478 activation of satellite cells and fusion to existing myofibers may take place during hindlimb  
479 immobilization (Guitart et al. 2018). Unlike our results, however, earlier research found no changes  
480 in MyoD protein levels, but a decrease in mRNA transcript levels in several hindlimb thigh muscles  
481 of thirteen-lined ground squirrels during hibernation (Tessier and Storey 2010). Therefore, our data  
482 suggest that the differential regulation of MyoD protein expression in muscle regeneration may be  
483 involved in the different adaptabilities of the diaphragm and gastrocnemius muscles in ground  
484 squirrels.



485 Previous studies have found that myogenin protein content is severely decreased (e.g., by 63%)  
486 in the diaphragm muscle after mechanical ventilation (Maes et al. 2008). Furthermore, although  
487 myogenin mRNA expression showed no change in 7-d immobilized mice (Guitart et al. 2018),  
488 levels were found to double ( $P < 0.05$ ) following two weeks of immobilization in healthy young  
489 men (Wall et al. 2014). In the current study, the expression level of myogenin showed a significant  
490 1.4-fold ( $P < 0.05$ ) increase in the diaphragm muscle, but a significant 12.2% ( $P < 0.05$ ) decrease  
491 in the gastrocnemius muscle of the hibernating squirrels compared with the summer active squirrels  
492 (**Figure 8A and 8C**). Consistent with our diaphragm muscle results, myogenin is reported to be up-  
493 regulated (2.4-fold) in the cardiomyocytes of thirteen-lined ground squirrels during late torpor,  
494 indicating a propensity for hypertrophy (Zhang et al. 2016a). Furthermore, in accordance with our  
495 gastrocnemius muscle results, myogenin expression is significantly decreased (by 52%) in the  
496 hindlimb thigh muscles, including oxidative and glycolytic fiber types, of thirteen-lined ground  
497 squirrels during late torpor relative to the euthermic state (Zhang et al. 2016b). Therefore, we  
498 speculate that high myogenin expression contributes to diaphragm hypertrophy, whereas low  
499 expression contributes to gastrocnemius atrophy in hibernating Daurian ground squirrels.

500 Myostatin is a potent negative regulator of skeletal muscle growth. Moreover, myostatin  
501 negatively regulates the activity of the Akt pathway, which promotes protein synthesis and increases  
502 activity of the ubiquitin-proteasome system to induce atrophy (Rodriguez et al. 2014). Up-regulation  
503 of myostatin can be triggered by mechanical ventilation (Liang et al. 2018). Furthermore, myostatin  
504 knockout-induced hypertrophy involves little or no input from satellite cells (Amthor et al. 2009).  
505 However, the role of myostatin in disuse muscle atrophy remains controversial. For example,  
506 increased myostatin mRNA and protein levels have been reported in mice following 11-d of  
507 spaceflight (Allen et al. 2009) and in humans after chronic disuse (Reardon et al. 2001); in contrast,  
508 decreased myostatin protein levels have been observed after 14 d of immobilization in healthy  
509 young men (Wall et al. 2014). In the current study, the protein expression level of myostatin  
510 decreased by 38.2% ( $P < 0.05$ ) in the hypertrophic diaphragm muscle but increased by 2.3-fold ( $P$   
511  $< 0.05$ ) in the atrophic gastrocnemius muscle (**Figure 8A and 8D**). Research thus far has indicated  
512 that myostatin protein levels are maintained in the hindlimb thigh muscles of thirteen-lined ground  
513 squirrels during early hibernation and torpor (Brooks et al. 2011). Inconsistent with our findings,  
514 thirteen-lined ground squirrels show low levels of myostatin in the gastrocnemius muscle over  
515 prolonged hibernation, indicating possible slow regeneration in response to injury and possible  
516 protection against the formation of fibrotic tissue (Andres-Mateos et al. 2012). Other research has  
517 also shown unaltered myostatin expression in atrophied left ventricles of grizzly bears (*Ursus*  
518 *arctos horribilis*), who tolerate extended periods of extremely low heart rate during hibernation  
519 (Barrows et al. 2011). Therefore, our results suggest different regulation mechanisms of muscle  
520 regeneration in the diaphragm and gastrocnemius muscles of hibernating animals, whereby the  
521 muscle regeneration potential of the diaphragm is enhanced and that of the gastrocnemius muscle  
522 is weakened. Variations in muscle regeneration ability may participate in the different adaptive



523 mechanisms of muscles in hibernators. A major novelty in the current study was our use of two  
524 different types of skeletal muscle to clarify muscle regeneration potential in hibernation.

525 In conclusion, different patterns of protein synthesis, protein degradation, and muscle  
526 regeneration were demonstrated in gastrocnemius muscle atrophy and diaphragm muscle  
527 hypertrophy during hibernation. Specifically, in the gastrocnemius muscle, protein synthesis,  
528 autophagy, and muscle regeneration were suppressed, and protein degradation was promoted, which  
529 likely contributed to muscle atrophy. In contrast, in the diaphragm muscle, protein synthesis,  
530 autophagy, and muscle regeneration were promoted, and protein degradation was inhibited, which  
531 likely contributed to muscle hypertrophy. Thus, the changes in protein synthesis and degradation  
532 displayed muscle specificity during hibernation. Collectively, the differences in muscle regeneration  
533 potential and regulatory patterns of protein metabolism may contribute to the different adaptabilities  
534 of the diaphragm and gastrocnemius muscles in Daurian ground squirrels during hibernation.

535

### 536 **Acknowledgements**

537 This study was supported by funds from the National Nature Science Foundation of China  
538 (31640072), National Nature Science Foundation of China (No. 31772459).

539

### 540 **Competing interests**

541 The authors declare that they have no competing interests.

542

### 543 **References**

544

545 Abnous, K., Dieni, C. A. and Storey, K. B. (2008) Regulation of Akt during hibernation in Richardson's  
546 ground squirrels. *Biochim Biophys Acta*, 1780(2), pp. 185-93.

547

548 Al-Nassan, S., Fujita, N., Kondo, H., Murakami, S. and Fujino, H. (2012) Chronic Exercise Training Down-  
549 Regulates TNF-alpha and Atrogin-1/MAFbx in Mouse Gastrocnemius Muscle Atrophy Induced  
550 by Hindlimb Unloading. *Acta Histochem Cytochem*, 45(6), pp. 343-9.

551

552 Allen, D. L., Bandstra, E. R., Harrison, B. C., Thorng, S., Stodieck, L. S., Kostenuik, P. J., Morony, S., Lacey,  
553 D. L., Hammond, T. G., Leinwand, L. L., Argraves, W. S., Bateman, T. A. and Barth, J. L. (2009)  
554 Effects of spaceflight on murine skeletal muscle gene expression. *J Appl Physiol* (1985), 106(2),  
555 pp. 582-595.

556

557 Amthor, H., Otto, A., Vulin, A., Rochat, A., Dumonceaux, J., Garcia, L., Mouisel, E., Hourde, C., Macharia,  
558 R., Friedrichs, M., Relaix, F., Zammit, P. S., Matsakas, A., Patel, K. and Partridge, T. (2009) Muscle  
559 hypertrophy driven by myostatin blockade does not require stem/precursor-cell activity. *Proc*  
560 *Natl Acad Sci U S A*, 106(18), pp. 7479-7484.

561

562 Andres-Mateos, E., Brinkmeier, H., Burks, T. N., Mejias, R., Files, D. C., Steinberger, M., Soleimani, A.,  
563 Marx, R., Simmers, J. L., Lin, B., Hedderick, E. F., Marr, T. G., Lin, B. M., Hourde, C., Leinwand, L.

- 564 A., Kuhl, D., Foller, M., Vogelsang, S., Hernandez-Diaz, I., Vaughan, D. K., de la Rosa, D. A., Lang,  
565 F. and Cohn, R. D. (2013) Activation of serum/glucocorticoid-induced kinase 1 (SGK1) is  
566 important to maintain skeletal muscle homeostasis and prevent atrophy. *Embo Molecular*  
567 *Medicine*, 5(1), pp. 80-91.
- 568
- 569 Andres-Mateos, E., Mejias, R., Soleimani, A., Lin, B. M., Burks, T. N., Marx, R., Lin, B., Zellars, R. C., Zhang,  
570 Y. G., Huso, D. L., Marr, T. G., Leinwand, L. A., Merriman, D. K. and Cohn, R. D. (2012) Impaired  
571 Skeletal Muscle Regeneration in the Absence of Fibrosis during Hibernation in 13-Lined Ground  
572 Squirrels. *PLoS One*, 7(11).
- 573
- 574 Arentson-Lantz, E. J., English, K. L., Paddon-Jones, D. and Fry, C. S. (2016) Fourteen days of bed rest  
575 induces a decline in satellite cell content and robust atrophy of skeletal muscle fibers in middle-  
576 aged adults. *J Appl Physiol (1985)*, 120(8), pp. 965-75.
- 577
- 578 Barrows, N. D., Nelson, O. L., Robbins, C. T. and Rourke, B. C. (2011) Increased Cardiac Alpha-Myosin  
579 Heavy Chain in Left Atria and Decreased Myocardial Insulin-Like Growth Factor (IGF-I)  
580 Expression Accompany Low Heart Rate in Hibernating Grizzly Bears. *Physiological And*  
581 *Biochemical Zoology*, 84(1), pp. 1-17.
- 582
- 583 Barta, J., Toth, A., Edes, I., Vaszily, M., Papp, J. G., Varro, A. and Papp, Z. (2005) Calpain-1-sensitive  
584 myofibrillar proteins of the human myocardium. *Mol Cell Biochem*, 278(1-2), pp. 1-8.
- 585
- 586 Bartoli, M. and Richard, I. (2005) Calpains in muscle wasting. *Int J Biochem Cell Biol*, 37(10), pp. 2115-  
587 33.
- 588
- 589 Blaauw, B., Schiaffino, S. and Reggiani, C. (2013) Mechanisms Modulating Skeletal Muscle Phenotype.  
590 *Comprehensive Physiology*, 3(4), pp. 1645-1687.
- 591
- 592 Bodine, S. C. (2013) Hibernation: the search for treatments to prevent disuse-induced skeletal muscle  
593 atrophy. *Exp Neurol*, 248, pp. 129-35.
- 594
- 595 Bodine, S. C., Stitt, T. N., Gonzalez, M., Kline, W. O., Stover, G. L., Bauerlein, R., Zlotchenko, E., Scrimgeour,  
596 A., Lawrence, J. C., Glass, D. J. and Yancopoulos, G. D. (2001) Akt/mTOR pathway is a crucial  
597 regulator of skeletal muscle hypertrophy and can prevent muscle atrophy in vivo. *Nature Cell*  
598 *Biology*, 3(11), pp. 1014-1019.
- 599
- 600 Brooks, N. E., Myburgh, K. H. and Storey, K. B. (2011) Myostatin levels in skeletal muscle of hibernating  
601 ground squirrels. *Journal Of Experimental Biology*, 214(15), pp. 2522-2527.
- 602
- 603 Brooks, N. E., Myburgh, K. H. and Storey, K. B. (2015) Muscle satellite cells increase during hibernation  
604 in ground squirrels. *Comparative Biochemistry And Physiology B-Biochemistry & Molecular*  
605 *Biology*, 189, pp. 55-61.
- 606
- 607 Bruells, C. S., Breuer, T., Maes, K., Bergs, I., Bleilevens, C., Marx, G., Weis, J., Gayan-Ramirez, G. and

- 608           Rossaint, R. (2016) Influence of weaning methods on the diaphragm after mechanical  
609           ventilation in a rat model. *BMC Pulm Med*, 16(1), pp. 127.  
610
- 611       Cai, D. C., McCarron, R. M., Yu, E. Z., Li, Y. Y. and Hallenbeck, J. (2004) Akt phosphorylation and kinase  
612           activity are down-regulated during hibernation in the 13-lined ground squirrel. *Brain Res*,  
613           1014(1-2), pp. 14-21.  
614
- 615       Cannavino, J., Brocca, L., Sandri, M., Bottinelli, R. and Pellegrino, M. A. (2014) PGC1-alpha over-  
616           expression prevents metabolic alterations and soleus muscle atrophy in hindlimb unloaded  
617           mice. *J Physiol*, 592(20), pp. 4575-89.  
618
- 619       Capetanaki, Y., Milner, D. J. and Weitzer, G. (1997) Desmin in muscle formation and maintenance:  
620           knockouts and consequences. *Cell Struct Funct*, 22(1), pp. 103-16.  
621
- 622       Chang, H., Jiang, S. F., Dang, K., Wang, H. P., Xu, S. H. and Gao, Y. F. (2016) iTRAQ-based proteomic  
623           analysis of myofibrillar contents and relevant synthesis and proteolytic proteins in soleus  
624           muscle of hibernating Daurian ground squirrels (*Spermophilus dauricus*). *Proteome Sci*, 14.  
625
- 626       Chang, H., Jiang, S. F., Ma, X. F., Peng, X., Zhang, J., Wang, Z., Xu, S. H., Wang, H. P. and Gao, Y. F. (2018a)  
627           Proteomic analysis reveals the distinct energy and protein metabolism characteristics involved  
628           in myofiber type conversion and resistance of atrophy in the extensor digitorum longus muscle  
629           of hibernating Daurian ground squirrels. *Comparative Biochemistry And Physiology D-  
630           Genomics & Proteomics*, 26, pp. 20-31.  
631
- 632       Chang, H., Lei, T. Y., Ma, X. F., Zhang, J., Wang, H. P., Zhang, X. Y. and Gao, Y. F. (2018b) Muscle-specific  
633           activation of calpain system in hindlimb unloading rats and hibernating Daurian ground  
634           squirrels: a comparison between artificial and natural disuse. *Journal Of Comparative  
635           Physiology B-Biochemical Systems And Environmental Physiology*, 188(5), pp. 863-876.  
636
- 637       Chen, M. C., Chen, Y. L., Lee, C. F., Hung, C. H. and Chou, T. C. (2015) Supplementation of Magnolol  
638           Attenuates Skeletal Muscle Atrophy in Bladder Cancer-Bearing Mice Undergoing  
639           Chemotherapy via Suppression of FoxO3 Activation and Induction of IGF-1. *PLoS One*, 10(11),  
640           pp. e0143594.  
641
- 642       Cotton, C. J. (2016) Skeletal muscle mass and composition during mammalian hibernation. *J Exp Biol*,  
643           219(Pt 2), pp. 226-34.  
644
- 645       Deveci, D. and Egginton, S. (2002) The effects of reduced temperature and photoperiod on body  
646           composition in hibernator and non-hibernator rodents. *Journal Of Thermal Biology*, 27(6), pp.  
647           467-478.  
648
- 649       Foletta, V. C., White, L. J., Larsen, A. E., Leger, B. and Russell, A. P. (2011) The role and regulation of  
650           MAFbx/atrogin-1 and MuRF1 in skeletal muscle atrophy. *Pflugers Arch*, 461(3), pp. 325-35.  
651

- 652 Gordon, B. S., Kelleher, A. R. and Kimball, S. R. (2013) Regulation of muscle protein synthesis and the  
653 effects of catabolic states. *International Journal Of Biochemistry & Cell Biology*, 45(10), pp.  
654 2147-2157.
- 655
- 656 Guitart, M., Lloreta, J., Manas-Garcia, L. and Barreiro, E. (2018) Muscle regeneration potential and  
657 satellite cell activation profile during recovery following hindlimb immobilization in mice. *J Cell*  
658 *Physiol*, 233(5), pp. 4360-4372.
- 659
- 660 Hastly, P., Bradley, A., Morris, J. H., Edmondson, D. G., Venuti, J. M., Olson, E. N. and Klein, W. H. (1993)  
661 Muscle deficiency and neonatal death in mice with a targeted mutation in the myogenin gene.  
662 *Nature*, 364(6437), pp. 501-6.
- 663
- 664 He, C. C., Bassik, M. C., Moresi, V., Sun, K., Wei, Y. J., Zou, Z. J., An, Z. Y., Loh, J., Fisher, J., Sun, Q. H.,  
665 Korsmeyer, S., Packer, M., May, H. I., Hill, J. A., Virgin, H. W., Gilpin, C., Xiao, G. H., Bassel-Duby,  
666 R., Scherer, P. E. and Levine, B. (2012) Exercise-induced BCL2-regulated autophagy is required  
667 for muscle glucose homeostasis. *Nature*, 481(7382), pp. 511-U126.
- 668
- 669 Hoehn, K. L., Hudachek, S. F., Summers, S. A. and Florant, G. L. (2004) Seasonal, tissue-specific regulation  
670 of Akt/protein kinase B and glycogen synthase in hibernators. *Am J Physiol Regul Integr Comp*  
671 *Physiol*, 286(3), pp. R498-504.
- 672
- 673 Hu, N. F., Chang, H., Du, B., Zhang, Q. W., Arfat, Y., Dang, K. and Gao, Y. F. (2017) Tetramethylpyrazine  
674 ameliorated disuse-induced gastrocnemius muscle atrophy in hindlimb unloading rats through  
675 suppression of Ca<sup>2+</sup>/ROS-mediated apoptosis. *Applied Physiology Nutrition And Metabolism*,  
676 42(2), pp. 117-127.
- 677
- 678 Huang, J. and Forsberg, N. E. (1998) Role of calpain in skeletal-muscle protein degradation. *Proc Natl*  
679 *Acad Sci U S A*, 95(21), pp. 12100-5.
- 680
- 681 Hudson, M. B., Smuder, A. J., Nelson, W. B., Wiggs, M. P., Shimkus, K. L., Fluckey, J. D., Szeto, H. H. and  
682 Powers, S. K. (2015) Partial Support Ventilation and Mitochondrial-Targeted Antioxidants  
683 Protect against Ventilator-Induced Decreases in Diaphragm Muscle Protein Synthesis. *PLoS One*,  
684 10(9).
- 685
- 686 Ichinoseki-Sekine, N., Yoshihara, T., Kakigi, R., Sugiura, T., Powers, S. K. and Naito, H. (2014) Heat stress  
687 protects against mechanical ventilation-induced diaphragmatic atrophy. *J Appl Physiol (1985)*,  
688 117(5), pp. 518-524.
- 689
- 690 Ivakine, E. A. and Cohn, R. D. (2014) Maintaining skeletal muscle mass: lessons learned from hibernation.  
691 *Exp Physiol*, 99(4), pp. 632-7.
- 692
- 693 Jackman, R. W. and Kandarian, S. C. (2004) The molecular basis of skeletal muscle atrophy. *Am J Physiol*  
694 *Cell Physiol*, 287(4), pp. C834-43.
- 695

- 696 Jones, S. W., Baker, D. J. and Greenhaff, P. L. (2003) G protein-coupled receptor kinases 2 and 5 are  
697 differentially expressed in rat skeletal muscle and remain unchanged following beta(2)-agonist  
698 administration. *Exp Physiol*, *88*(2), pp. 277-284.  
699
- 700 Kihara, A., Kabeya, Y., Ohsumi, Y. and Yoshimori, T. (2001) Beclin-phosphatidylinositol 3-kinase complex  
701 functions at the trans-Golgi network. *Embo Reports*, *2*(4), pp. 330-335.  
702
- 703 Langley, B., Thomas, M., Bishop, A., Sharma, M., Gilmour, S. and Kambadur, R. (2002) Myostatin inhibits  
704 myoblast differentiation by down-regulating MyoD expression. *Journal Of Biological Chemistry*,  
705 *277*(51), pp. 49831-49840.  
706
- 707 Larson, J., Drew, K. L., Folkow, L. P., Milton, S. L. and Park, T. J. (2014) No oxygen? No problem! Intrinsic  
708 brain tolerance to hypoxia in vertebrates. *Journal Of Experimental Biology*, *217*(7), pp. 1024-  
709 1039.  
710
- 711 Lee, K., Park, J. Y., Yoo, W., Gwag, T., Lee, J. W., Byun, M. W. and Choi, I. (2008) Overcoming muscle  
712 atrophy in a hibernating mammal despite prolonged disuse in dormancy: proteomic and  
713 molecular assessment. *J Cell Biochem*, *104*(2), pp. 642-56.  
714
- 715 Lee, K., So, H., Gwag, T., Ju, H., Lee, J. W., Yamashita, M. and Choi, I. (2010) Molecular Mechanism  
716 Underlying Muscle Mass Retention in Hibernating Bats: Role of Periodic Arousal. *J Cell Physiol*,  
717 *222*(2), pp. 313-319.  
718
- 719 Levine, B. and Yuan, J. Y. (2005) Autophagy in cell death: an innocent convict? *Journal Of Clinical*  
720 *Investigation*, *115*(10), pp. 2679-2688.  
721
- 722 Li, Z., Li, X., Gao, X., Du, M. and Zhang, D. (2017) Effect of inhibition of mu-calpain on the myofibril  
723 structure and myofibrillar protein degradation in postmortem ovine muscle. *J Sci Food Agric*,  
724 *97*(7), pp. 2122-2131.  
725
- 726 Liang, F., Li, T., Azuelos, I., Giordano, C., Liang, H., Hussain, S. N., Matecki, S. and Petrof, B. J. (2018)  
727 Ventilator-induced diaphragmatic dysfunction in MDX mice. *Muscle Nerve*, *57*(3), pp. 442-448.  
728
- 729 Linderman, J. K., Gosselink, K. L., Booth, F. W., Mukku, V. R. and Grindeland, R. E. (1994) Resistance  
730 exercise and growth hormone as countermeasures for skeletal muscle atrophy in hindlimb-  
731 suspended rats. *Am J Physiol*, *267*(2 Pt 2), pp. R365-71.  
732
- 733 Liu, Y., Vertommen, D., Rider, M. H. and Lai, Y. C. (2013) Mammalian target of rapamycin-independent  
734 S6K1 and 4E-BP1 phosphorylation during contraction in rat skeletal muscle. *Cell Signal*, *25*(9),  
735 pp. 1877-1886.  
736
- 737 Ma, X. F., Chang, H., Wang, Z., Xu, S. H., Peng, X., Zhang, J., Yan, X., Lei, T. Y., Wang, H. P. and Gao, Y. F.  
738 (2019) Differential activation of the calpain system involved in individualized adaptation of  
739 different fast-twitch muscles in hibernating Daurian ground squirrels. *J Appl Physiol* (1985),

- 740 127(2), pp. 328-341.
- 741
- 742 Maes, K., Stamiris, A., Thomas, D., Cielen, N., Smuder, A., Powers, S. K., Leite, F. S., Hermans, G.,  
743 Decramer, M., Hussain, S. N. and Gayan-Ramirez, G. (2014) Effects of controlled mechanical  
744 ventilation on sepsis-induced diaphragm dysfunction in rats. *Crit Care Med*, 42(12), pp. e772-  
745 82.
- 746
- 747 Maes, K., Testelmans, D., Cadot, P., Deruisseau, K., Powers, S. K., Decramer, M. and Gayan-Ramirez, G.  
748 (2008) Effects of acute administration of corticosteroids during mechanical ventilation on rat  
749 diaphragm. *Am J Respir Crit Care Med*, 178(12), pp. 1219-26.
- 750
- 751 Magne, H., Savary-Auzeloux, I., Vazeille, E., Claustre, A., Attaix, D., Anne, L., Sante-Lhoutellier, V.,  
752 Gatellier, P., Dardevet, D. and Combaret, L. (2011) Lack of muscle recovery after immobilization  
753 in old rats does not result from a defect in normalization of the ubiquitin-proteasome and the  
754 caspase-dependent apoptotic pathways. *Journal Of Physiology-London*, 589(3), pp. 511-524.
- 755
- 756 May, D., Gilon, D., Djonov, V., Ltin, A., Lazarus, A., Gordon, O., Rosenberger, C. and Keshet, E. (2008)  
757 Transgenic system for conditional induction and rescue of chronic myocardial hibernation  
758 provides insights into genomic programs of hibernation. *Proc Natl Acad Sci U S A*, 105(1), pp.  
759 282-287.
- 760
- 761 McClung, J. M., Whidden, M. A., Kavazis, A. N., Falk, D. J., DeRuisseau, K. C. and Powers, S. K. (2008)  
762 Redox regulation of diaphragm proteolysis during mechanical ventilation. *Faseb Journal*, 22.
- 763
- 764 McFarlane, C., Hui, G. Z., Amanda, W. Z. W., Lau, H. Y., Lokireddy, S., Ge, X. J., Mouly, V., Butler-Browne,  
765 G., Gluckman, P. D., Sharma, M. and Kambadur, R. (2011) Human myostatin negatively  
766 regulates human myoblast growth and differentiation. *American Journal Of Physiology-Cell  
767 Physiology*, 301(1), pp. C195-C203.
- 768
- 769 Moresi, V., Carrer, M., Grueter, C. E., Rifki, O. F., Shelton, J. M., Richardson, J. A., Bassel-Duby, R. and  
770 Olson, E. N. (2012) Histone deacetylases 1 and 2 regulate autophagy flux and skeletal muscle  
771 homeostasis in mice. *Proc Natl Acad Sci U S A*, 109(5), pp. 1649-1654.
- 772
- 773 Perry, S. V. (1998) Troponin T: genetics, properties and function. *J Muscle Res Cell Motil*, 19(6), pp. 575-  
774 602.
- 775
- 776 Popova, S. S., Vikhlyantsev, I. M., Zakharova, N. M., Podlubnaya, Z. A. and Fesenko, E. E. (2017) Seasonal  
777 changes in proteolytic activity of calpains in striated muscles of long-tailed ground squirrel  
778 *Spermophilus undulatus*. *Doklady Biochemistry And Biophysics*, 472(1), pp. 56-59.
- 779
- 780 Powers, S. K., Smuder, A. J., Fuller, D. and Levine, S. (2013) CrossTalk proposal: Mechanical ventilation-  
781 induced diaphragm atrophy is primarily due to inactivity. *Journal Of Physiology-London*,  
782 591(21), pp. 5255-5257.
- 783



- 784 Racz, G. Z., Gayan-Ramirez, G., Testelmans, D., Cadot, P., De Paepe, K., Zador, E., Wuytack, F. and  
785 Decramer, M. (2003) Early changes in rat diaphragm biology with mechanical ventilation. *Am J*  
786 *Respir Crit Care Med*, 168(3), pp. 297-304.  
787
- 788 Reardon, K. A., Davis, J., Kapsa, R. M. I., Choong, P. and Byrne, E. (2001) Myostatin, insulin-like growth  
789 factor-1, and leukemia inhibitory factor mRNAs are upregulated in chronic human disuse  
790 muscle atrophy. *Muscle Nerve*, 24(7), pp. 893-899.  
791
- 792 Reid, W. D., Ng, A., Wilton, R. and Milsom, W. K. (1995) Characteristics of diaphragm muscle fibre types  
793 in hibernating squirrels. *Respir Physiol*, 101(3), pp. 301-9.  
794
- 795 Reilly, B. D. and Franklin, C. E. (2016) Prevention of muscle wasting and osteoporosis: the value of  
796 examining novel animal models. *J Exp Biol*, 219(Pt 17), pp. 2582-95.  
797
- 798 Rodriguez, J., Vernus, B., Chelh, I., Cassar-Malek, I., Gabillard, J. C., Sassi, A. H., Seilliez, I., Picard, B. and  
799 Bonniou, A. (2014) Myostatin and the skeletal muscle atrophy and hypertrophy signaling  
800 pathways. *Cellular And Molecular Life Sciences*, 71(22), pp. 4361-4371.  
801
- 802 Romanello, V. and Sandri, M. (2016) Mitochondrial Quality Control and Muscle Mass Maintenance.  
803 *Front Physiol*, 6.  
804
- 805 Rourke, B. C., Yokoyama, Y., Milsom, W. K. and Caiozzo, V. J. (2004) Myosin isoform expression and  
806 MAFbx mRNA levels in hibernating golden-mantled ground squirrels (*Spermophilus lateralis*).  
807 *Physiol Biochem Zool*, 77(4), pp. 582-93.  
808
- 809 Schiaffino, S., Dyar, K. A., Ciciliot, S., Blaauw, B. and Sandri, M. (2013) Mechanisms regulating skeletal  
810 muscle growth and atrophy. *Febs Journal*, 280(17), pp. 4294-4314.  
811
- 812 Scicchitano, B. M., Faraldi, M. and Musaro, A. (2015) The Proteolytic Systems of Muscle Wasting. *Recent*  
813 *Adv DNA Gene Seq*, 9(1), pp. 26-35.  
814
- 815 Smuder, A. J., Kavazis, A. N., Hudson, M. B., Nelson, W. B. and Powers, S. K. (2010) Oxidation enhances  
816 myofibrillar protein degradation via calpain and caspase-3. *Free Radic Biol Med*, 49(7), pp.  
817 1152-60.  
818
- 819 Smuder, A. J., Sollanek, K. J., Nelson, W. B., Min, K., Talbert, E. E., Kavazis, A. N., Hudson, M. B., Sandri,  
820 M., Szeto, H. H. and Powers, S. K. (2018) Crosstalk between autophagy and oxidative stress  
821 regulates proteolysis in the diaphragm during mechanical ventilation. *Free Radical Biology And*  
822 *Medicine*, 115, pp. 179-190.  
823
- 824 Souza, L. D., Camargo, R., Demasi, M., Santana, J. M., de Sa, C. M. and de Freitas, S. M. (2014) Effects of  
825 an Anticarcinogenic Bowman-Birk Protease Inhibitor on Purified 20S Proteasome and MCF-7  
826 Breast Cancer Cells. *PLoS One*, 9(1).  
827

- 828 Staples, J. F. and Brown, J. C. L. (2008) Mitochondrial metabolism in hibernation and daily torpor: a  
829 review. *Journal Of Comparative Physiology B-Biochemical Systems And Environmental*  
830 *Physiology*, 178(7), pp. 811-827.
- 831
- 832 Su, Y. H., Su, Z., Zhang, K., Yuan, Q. K., Liu, Q., Lv, S., Wang, Z. H. and Zou, W. (2014) [The changes of p-  
833 Akt/MuRF1/FoxO1 proteins expressions in the conditions of training and immobilization in rats'  
834 gastrocnemius muscle]. *Sheng Li Xue Bao*, 66(5), pp. 589-96.
- 835
- 836 Suetta, C., Frandsen, U., Mackey, A. L., Jensen, L., Hvid, L. G., Bayer, M. L., Petersson, S. J., Schroder, H.  
837 D., Andersen, J. L., Aagaard, P., Schjerling, P. and Kjaer, M. (2013) Ageing is associated with  
838 diminished muscle re-growth and myogenic precursor cell expansion early after immobility-  
839 induced atrophy in human skeletal muscle. *Journal Of Physiology-London*, 591(15), pp. 3789-  
840 3804.
- 841
- 842 Tanida, I., Minematsu-Ikeguchi, N., Ueno, T. and Kominami, E. (2005) Lysosomal turnover, but not a  
843 cellular level, of endogenous LC3 is a marker for autophagy. *Autophagy*, 1(2), pp. 84-91.
- 844
- 845 Tanida, I., Ueno, T. and Kominami, E. (2004) LC3 conjugation system in mammalian autophagy.  
846 *International Journal Of Biochemistry & Cell Biology*, 36(12), pp. 2503-2518.
- 847
- 848 Tessier, S. N. and Storey, K. B. (2010) Expression of myocyte enhancer factor-2 and downstream genes  
849 in ground squirrel skeletal muscle during hibernation. *Mol Cell Biochem*, 344(1-2), pp. 151-62.
- 850
- 851 Trendelenburg, A. U., Meyer, A., Rohner, D., Boyle, J., Hatakeyama, S. and Glass, D. J. (2009) Myostatin  
852 reduces Akt/TORC1/p70S6K signaling, inhibiting myoblast differentiation and myotube size.  
853 *American Journal Of Physiology-Cell Physiology*, 296(6), pp. C1258-C1270.
- 854
- 855 Vigelso, A., Dybboe, R., Hansen, C. N., Dela, F., Helge, J. W. and Grau, A. G. (2015) GAPDH and beta-actin  
856 protein decreases with aging, making Stain-Free technology a superior loading control in  
857 Western blotting of human skeletal muscle. *J Appl Physiol (1985)*, 118(3), pp. 386-394.
- 858
- 859 Wall, B., Dirks, M., Snijders, T., Stephens, F., Senden, J. and van Loon, L. (2014) Short-term muscle disuse  
860 atrophy is not associated with increased skeletal muscle lipid accumulation or impaired  
861 oxidative enzyme activity in young or old men. *Faseb Journal*, 28(1).
- 862
- 863 Wei, Y., Gong, L., Fu, W., Xu, S., Wang, Z., Zhang, J., Ning, E., Chang, H., Wang, H. and Gao, Y. (2018)  
864 Unexpected regulation pattern of the IKKbeta/NF-kappaB/MuRF1 pathway with remarkable  
865 muscle plasticity in the Daurian ground squirrel (*Spermophilus dauricus*). *J Cell Physiol*, 233(11),  
866 pp. 8711-8722.
- 867
- 868 Wickler, S. J., Hoyt, D. F. and van Breukelen, F. (1991) Disuse atrophy in the hibernating golden-mantled  
869 ground squirrel, *Spermophilus lateralis*. *Am J Physiol*, 261(5 Pt 2), pp. R1214-7.
- 870
- 871 Wu, C. W. and Storey, K. B. (2012) Regulation of the mTOR signaling network in hibernating thirteen-

872 lined ground squirrels. *Journal Of Experimental Biology*, 215(10), pp. 1720-1727.  
873  
874 Yang, C. X., He, Y., Gao, Y. F., Wang, H. P. and Goswami, N. (2014) Changes in calpains and calpastatin in  
875 the soleus muscle of Daurian ground squirrels during hibernation. *Comparative Biochemistry  
876 And Physiology a-Molecular & Integrative Physiology*, 176, pp. 26-31.  
877  
878 Yu, T., Wang, M. L., Wen, Y. D., Cao, Y. Y., Shen, G. G., Jiang, X. G., Wu, J. Y., Lu, W. H. and Jin, X. J. (2018)  
879 Activation of mammalian target of rapamycin induces lipid accumulation in the diaphragm of  
880 ventilated rats and hypoxia-treated C2C12 cells. *Journal Of Surgical Research*, 225, pp. 82-89.  
881  
882 Zanou, N. and Gailly, P. (2013) Skeletal muscle hypertrophy and regeneration: interplay between the  
883 myogenic regulatory factors (MRFs) and insulin-like growth factors (IGFs) pathways. *Cellular  
884 And Molecular Life Sciences*, 70(21), pp. 4117-4130.  
885  
886 Zhang, J., Wei, Y., Qu, T., Wang, Z., Xu, S., Peng, X., Yan, X., Chang, H., Wang, H. and Gao, Y. (2019)  
887 Prosurvival roles mediated by the PERK signaling pathway effectively prevent excessive  
888 endoplasmic reticulum stress-induced skeletal muscle loss during high-stress conditions of  
889 hibernation. *J Cell Physiol*, 234(11), pp. 19728-19739.  
890  
891 Zhang, Y. C., Aguilar, O. A. and Storey, K. B. (2016a) Transcriptional activation of muscle atrophy  
892 promotes cardiac muscle remodeling during mammalian hibernation. *Peerj*, 4.  
893  
894 Zhang, Y. C., Tessier, S. N. and Storey, K. B. (2016b) Inhibition of skeletal muscle atrophy during torpor in  
895 ground squirrels occurs through downregulation of MyoG and inactivation of Foxo4.  
896 *Cryobiology*, 73(2), pp. 112-119.  
897  
898  
899  
900  
901  
902  
903  
904  
905  
906  
907  
908  
909  
910  
911  
912  
913

914 **Figure legend**

915

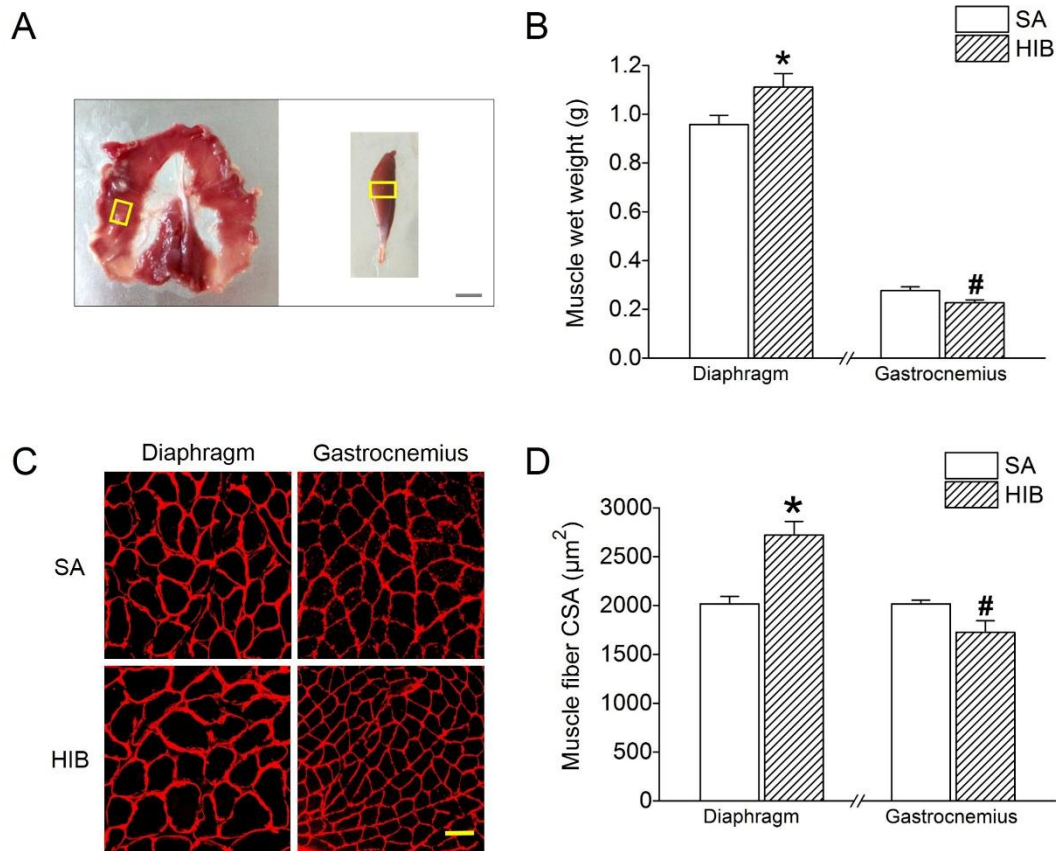

916

917 **Figure 1.** Muscle wet weight and fiber cross-sectional area (CSA) in diaphragm and gastrocnemius  
918 muscles.

919 **(A)** Photos of diaphragm (left) and gastrocnemius (right) muscles. Scale bar = 4 mm. The yellow  
920 box shows the fixed geometric position for frozen section. **(B)** Muscle wet weight (g) in different  
921 groups. **(C)** Representative images showing cross-sections in diaphragm and gastrocnemius muscles.  
922 Red represents laminin stain of myofiber interstitial tissue. Scale bar = 50 μm. **(D)** Bar graph  
923 showing the changes of muscle fiber CSA. SA: summer active ground squirrels, HIB: hibernating  
924 ground squirrels. Data represents mean ± SEM,  $n = 8$ . \* $P < 0.05$ , compared with SA in diaphragm  
925 muscle. # $P < 0.05$ , compared with SA in gastrocnemius muscle.

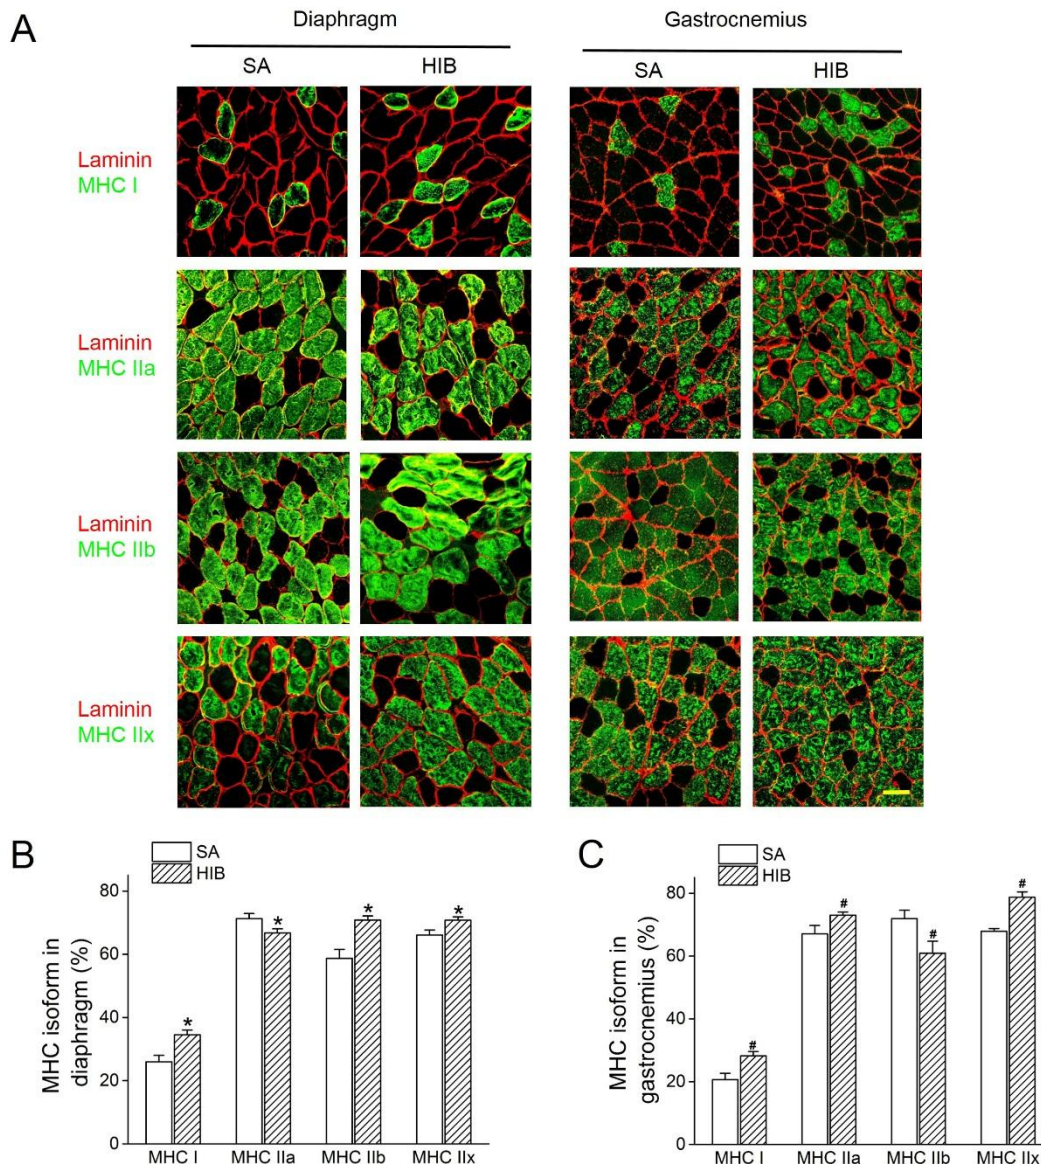

926

927 **Figure 2.** Fiber-type distribution in diaphragm and gastrocnemius muscles.

928 (A) Representative immunofluorescent images showing MHC I, MHC IIa, MHC IIb, and MHC IIx  
 929 fibers with green staining in diaphragm and gastrocnemius muscles. Red represents laminin stain of  
 930 myofiber interstitial tissue. Scale bar = 50  $\mu$ m. (B) Bar graph showing the changes of fiber-type  
 931 distribution in diaphragm muscle. (C) Bar graph showing the changes of fiber-type distribution in  
 932 gastrocnemius muscle. SA: summer active ground squirrels, HIB: hibernating ground squirrels.  
 933 Data represents mean  $\pm$  SEM,  $n = 8$ . \* $P < 0.05$ , compared with SA in diaphragm muscle. # $P < 0.05$ ,  
 934 compared with SA in gastrocnemius muscle.



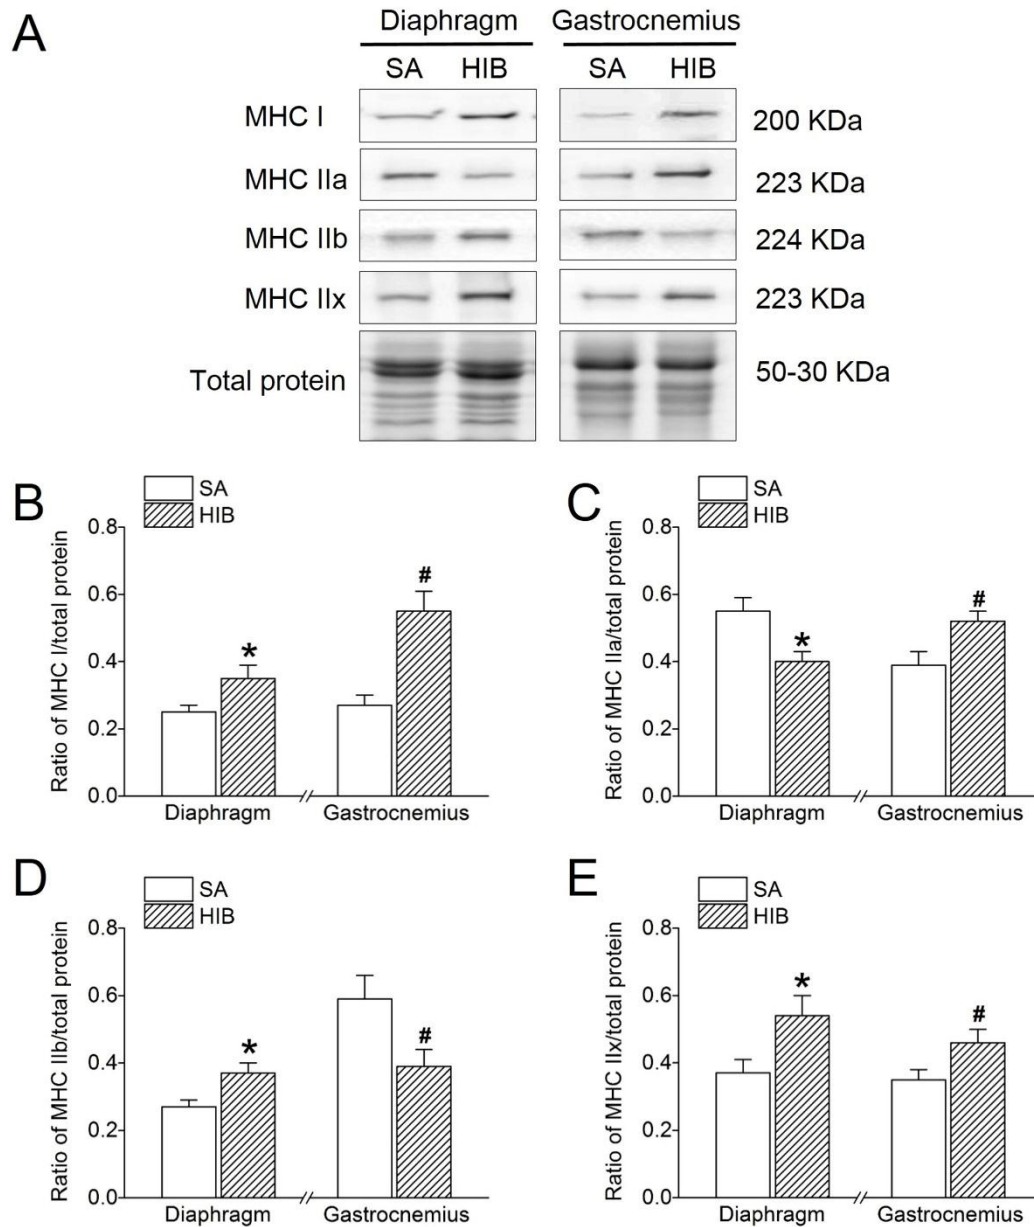

935

936 **Figure 3.** Protein expression levels of MHC I, MHC IIa, MHC IIb, and MHC IIx.

937 (A) Representative immunoblots of MHC I, MHC IIa, MHC IIb, and MHC IIx in each group. (B)

938 Changes of the ratio of MHC I to total protein. (C) Changes of the ratio of MHC IIa to total protein.

939 (D) Changes of the ratio of MHC IIb to total protein. (E) Changes of the ratio of MHC IIx to total

940 protein. SA: summer active ground squirrels, HIB: hibernating ground squirrels. Data represent

941 mean  $\pm$  SEM,  $n = 8$ . \* $P < 0.05$ , compared with SA in diaphragm muscle. # $P < 0.05$ , compared with

942 SA in gastrocnemius muscle.



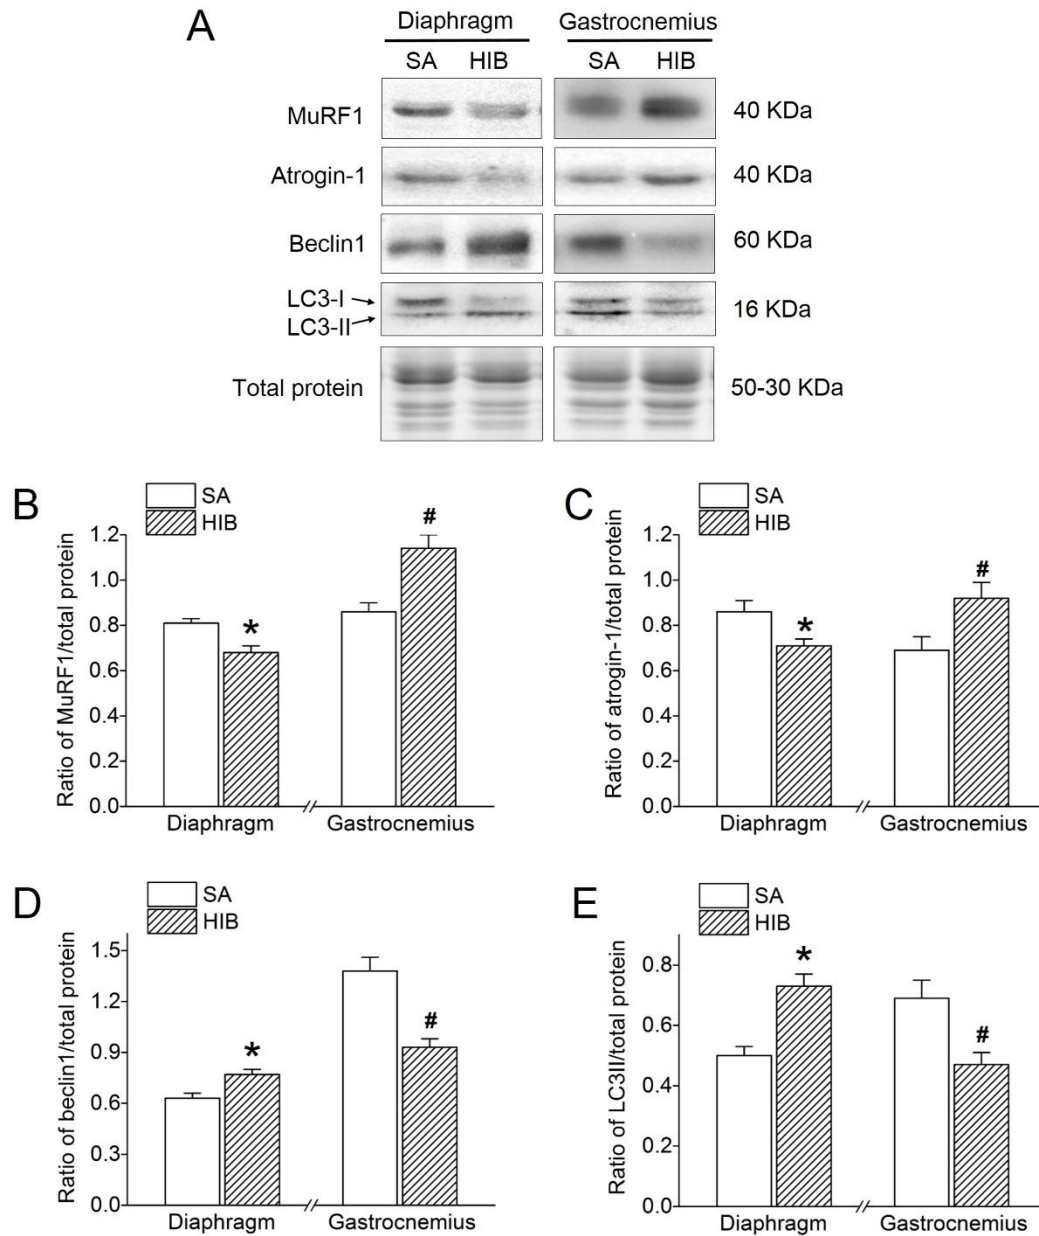

943

944

**Figure 4.** Protein expression levels of MuRF1, atrogin-1, Beclin1 and LC3-II.

945

(A) Representative immunoblots of MuRF1, atrogin-1, Beclin1 and LC3-II in each group. (B)

946

Changes of the ratio of MuRF1 to total protein. (C) Changes of the ratio of atrogin-1 to total protein.

947

(D) Changes of the ratio of Beclin1 to total protein. (E) Changes of the ratio of LC3-II to total

948

protein. SA: summer active ground squirrels, HIB: hibernating ground squirrels. Data represent

949

mean  $\pm$  SEM,  $n = 8$ . \* $P < 0.05$ , compared with SA in diaphragm muscle. # $P < 0.05$ , compared with

950

SA in gastrocnemius muscle.

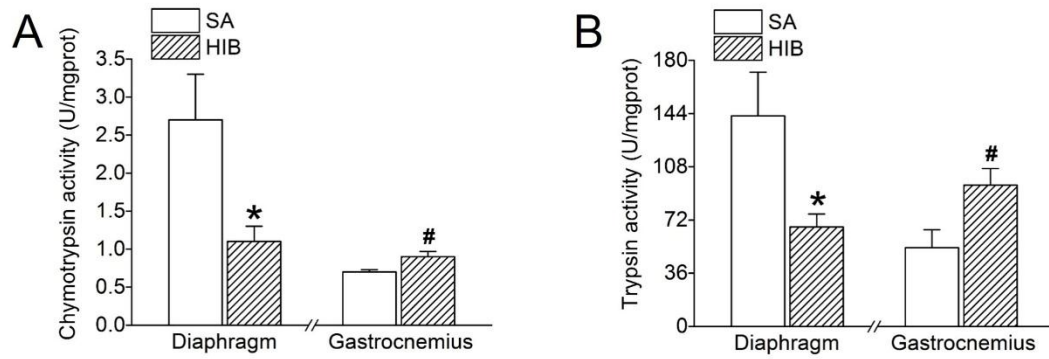

951

952 **Figure 5. Proteasome activity.**

953 **(A) Chymotrypsin proteasome activity. (B) Trypsin proteasome activity.** SA: summer active  
954 ground squirrels, HIB: hibernating ground squirrels. Data represent mean  $\pm$  SEM,  $n = 8$ . \* $P <$   
955 0.05, compared with SA in diaphragm muscle. # $P <$  0.05, compared with SA in gastrocnemius  
956 muscle.

957

958

959

960

961

962

963

964

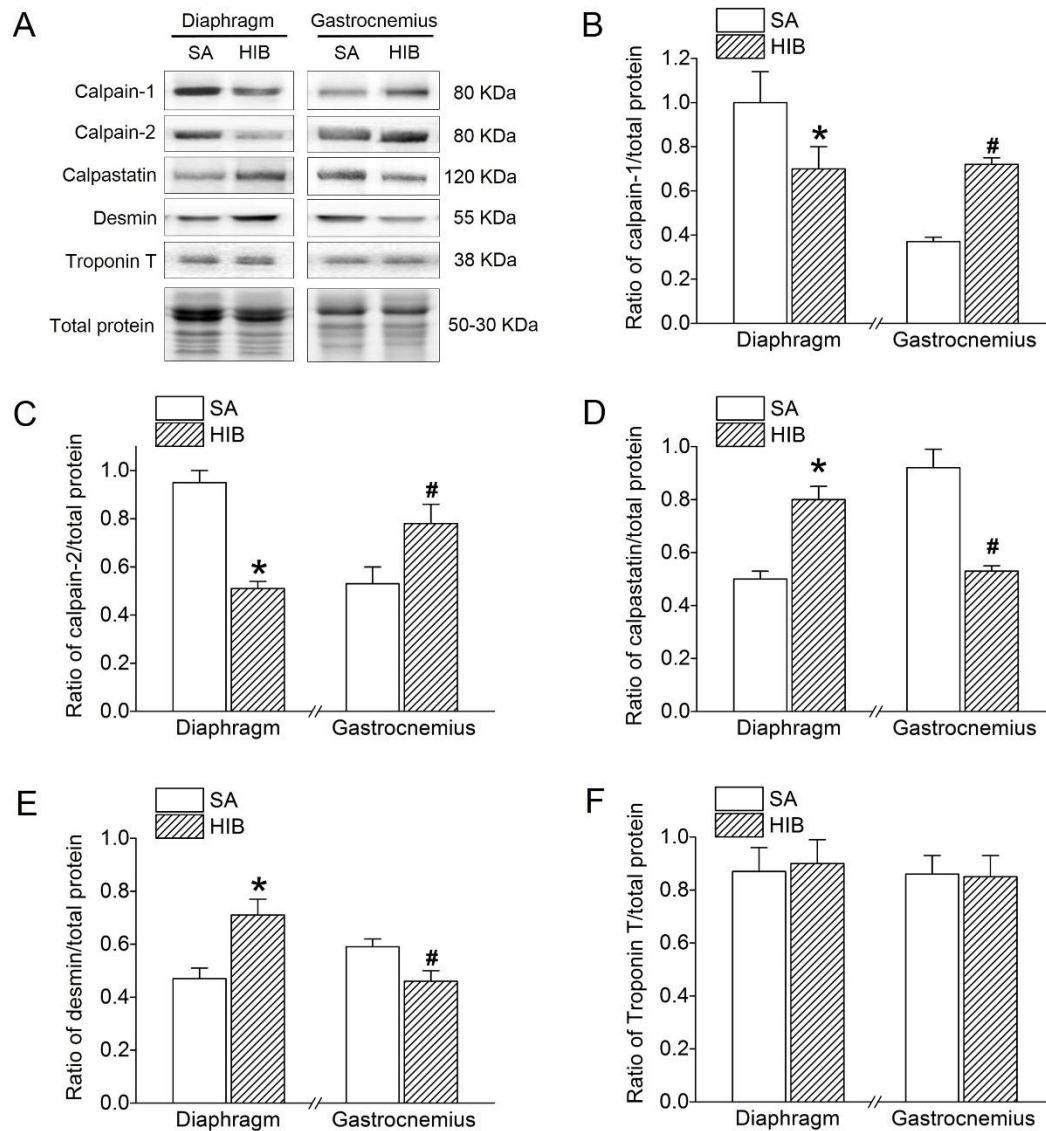

965

966 **Figure 6.** Protein expression levels of calpain-1, calpain-2, calpastatin, desmin and troponin T.

967 (A) Representative immunoblots of calpain-1, calpain-2, calpastatin, desmin and troponin T in each

968 group. (B) Changes of the ratio of calpain-1 to total protein. (C) Changes of the ratio of calpain-2

969 to total protein. (D) Changes of the ratio of calpastatin to total protein. (E) Changes of the ratio of

970 desmin to total protein. (F) Changes of the ratio of troponin T to total protein. SA: summer active

971 ground squirrels, HIB: hibernating ground squirrels. Data represent mean  $\pm$  SEM,  $n = 8$ . \* $P < 0.05$ ,

972 compared with SA in diaphragm muscle. # $P < 0.05$ , compared with SA in gastrocnemius muscle.

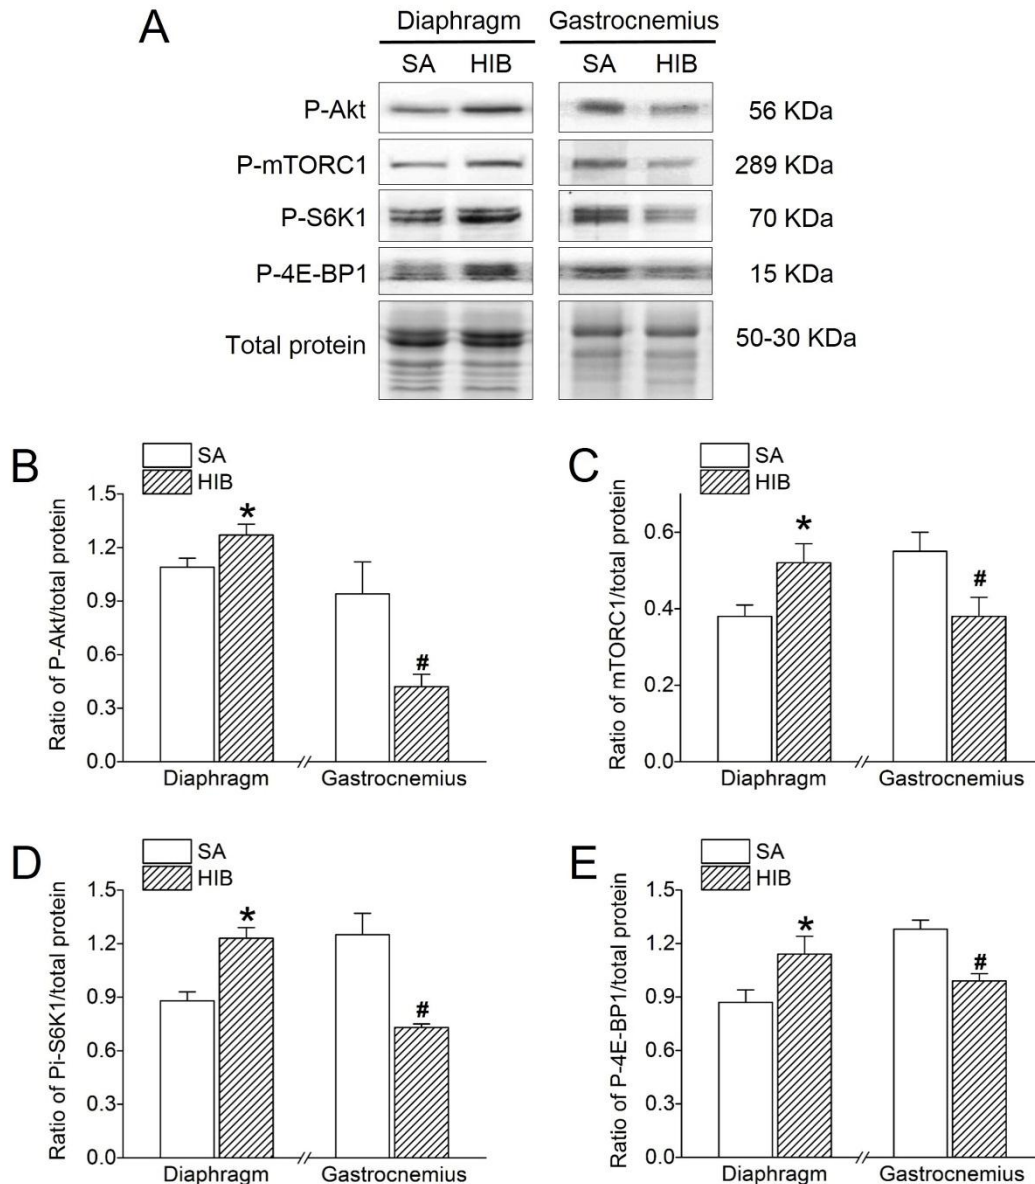

973

974 **Figure 7.** Protein expression levels of P-Akt, P-mTORC1, P-S6K1 and P-4E-BP1.

975 (A) Representative immunoblots of P-Akt, P-mTORC1, P-S6K1 and P-4E-BP1 in each group. (B)

976 Changes of the ratio of P-Akt to total protein. (C) Changes of the ratio of P-mTORC1 to total protein.

977 (D) Changes of the ratio of P-S6K1 to total protein. (E) Changes of the ratio of P-4E-BP1 to total

978 protein. SA: summer active ground squirrels, HIB: hibernating ground squirrels. Data represent

979 mean  $\pm$  SEM,  $n = 8$ . \* $P < 0.05$ , compared with SA in diaphragm muscle. # $P < 0.05$ , compared with

980 SA in gastrocnemius muscle.

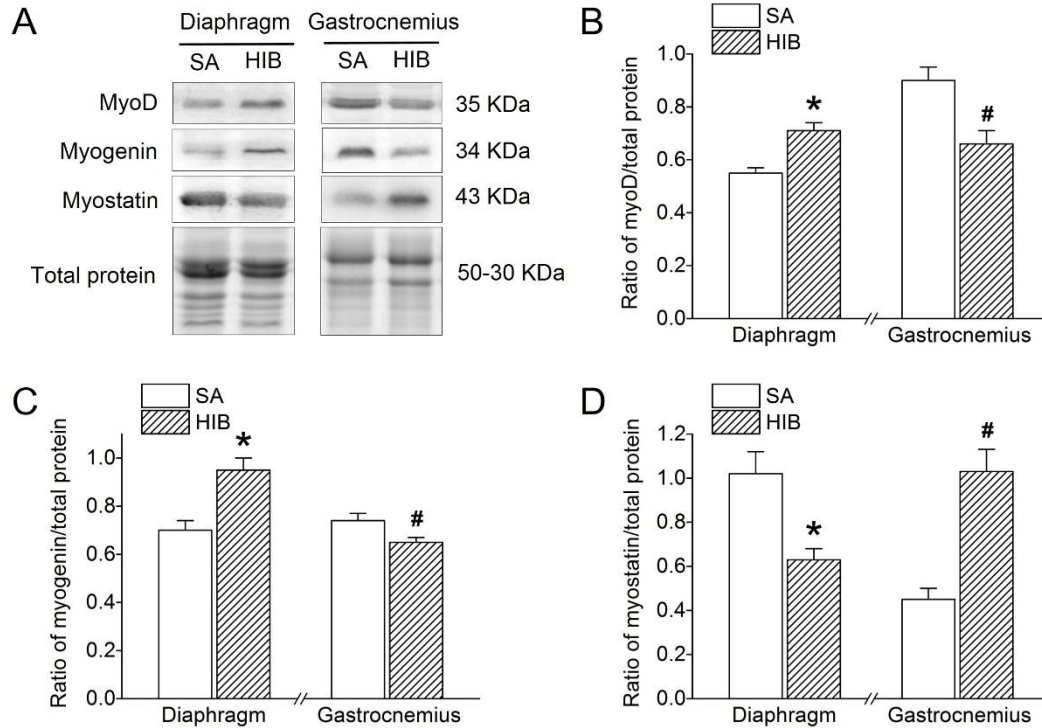

981

982 **Figure 8.** Protein expression levels of MyoD, myogenin and myostatin.

983 (A) Representative immunoblots of MyoD, myogenin and myostatin in each group. (B) Changes of  
 984 the ratio of MyoD to total protein. (C) Changes of the ratio of myogenin to total protein. (D) Changes  
 985 of the ratio of myostatin to total protein. SA: summer active ground squirrels, HIB: hibernating  
 986 ground squirrels. Data represent mean  $\pm$  SEM,  $n = 8$ . \* $P < 0.05$ , compared with SA in diaphragm  
 987 muscle. # $P < 0.05$ , compared with SA in gastrocnemius muscle.

988

989

990

991

992

993

994

995

996

997

998

999

1000

1001

1002

1003

1004

1005 **Table 1.** Body weight (BW) for all the groups.

|          | BW before hibernation (g) | BW at experiment time (g) |
|----------|---------------------------|---------------------------|
| 1007 SA  | 288.3 ± 7.9               | 277.0 ± 16.2              |
| 1008 HIB | 277.0 ± 16.2              | 247.8 ± 21.6*             |

1009 SA: summer active ground squirrels, HIB: hibernating ground squirrels. Data represent mean ± SEM,  
1010  $n = 8$ . \* $P < 0.05$  compared with SA group.

1011

1012
